# Genetic mechanisms of critical illness in Covid-19

Erola Pairo-Castineira\*,<sup>1</sup> Sara Clohisey\*,<sup>1</sup> Lucija Klaric\*,<sup>2</sup> Andrew Bretherick\*,<sup>1,2</sup> Konrad Rawlik\*,<sup>1</sup> Nick Parkinson,<sup>1</sup> Dorota Pasko,<sup>3</sup> Susan Walker,<sup>3</sup> Anne Richmond,<sup>2</sup> Max Head Fourman,<sup>1</sup> Clark D Russell,<sup>1,4</sup> Andrew Law,<sup>1</sup> James Furniss,<sup>1</sup> Elvina Gountouna,<sup>5</sup> Nicola Wrobel,<sup>6</sup> Loukas Moutsianas,<sup>3</sup> Bo Wang,<sup>1</sup> Alison Meynert,<sup>2</sup> Zhijian Yang,<sup>7</sup> Ranran Zhai,<sup>7</sup> Chenqing Zheng,<sup>7</sup> Fiona Griffiths,<sup>1</sup> Wilna Oosthuyzen,<sup>1</sup> Graeme Grimes,<sup>2</sup> Barbara Shih,<sup>1</sup> Sean Keating,<sup>8</sup> Marie Zechner,<sup>1</sup> Chris Haley,<sup>1</sup> David J. Porteous,<sup>5</sup> Caroline Hayward,<sup>5</sup> Julian Knight,<sup>9</sup> Charlotte Summers,<sup>10</sup> Manu Shankar-Hari,<sup>11,12</sup> Paul Klenerman,<sup>9</sup> Lance Turtle,<sup>13</sup> Antonia Ho,<sup>14</sup> Charles Hinds,<sup>15</sup> Peter Horby,<sup>16</sup> Alistair Nichol,<sup>17,18,19</sup> David Maslove,<sup>20</sup> Lowell Ling,<sup>21</sup> Danny McAuley,<sup>22,23</sup> Hugh Montgomery,<sup>24</sup> Timothy Walsh,<sup>8</sup> The GenOMICC Investigators, The ISARIC-4C Investigators, The Covid-19 Human Genetics Initiative, Xia Shen,<sup>7,25,26</sup> Kathy Rowan,<sup>27</sup> Angie Fawkes,<sup>6</sup> Lee Murphy,<sup>6</sup> Chris P. Ponting,<sup>2</sup> Albert Tenesa,<sup>1,2,25</sup> Mark Caulfield,<sup>3,15</sup> Richard Scott,<sup>3,28</sup> Peter J.M. Openshaw,<sup>29</sup> Malcolm G. Semple,<sup>30</sup> Veronique Vitart,<sup>2</sup> James F. Wilson,<sup>2,25</sup> J. Kenneth Baillie.<sup>1,8</sup>

## Affiliations

1. Roslin Institute, University of Edinburgh, Easter Bush, Edinburgh, EH25 9RG, UK.
2. MRC Human Genetics Unit, Institute of Genetics and Molecular Medicine, University of Edinburgh, Western General Hospital, Crewe Road, Edinburgh, EH4 2XU, UK.
3. Genomics England, London, UK.
4. University of Edinburgh Centre for Inflammation Research, The Queen's Medical Research Institute, Edinburgh, UK.
5. Centre for Genomic and Experimental Medicine, Institute of Genetics and Molecular Medicine, University of Edinburgh, Western General Hospital, Crewe Road, Edinburgh, EH4 2XU, UK.
6. Edinburgh Clinical Research Facility, Western General Hospital, University of Edinburgh, EH4 2XU, UK.
7. Biostatistics Group, School of Life Sciences, Sun Yat-sen University, Guangzhou, China.
8. Intensive Care Unit, Royal Infirmary of Edinburgh, 54 Little France Drive, Edinburgh, EH16 5SA, UK.
9. Wellcome Centre for Human Genetics, University of Oxford, Oxford, UK.
10. Department of Medicine, University of Cambridge, Cambridge, UK.
11. Department of Intensive Care Medicine, Guy's and St. Thomas NHS Foundation Trust, London, UK.
12. School of Immunology and Microbial Sciences, King's College London, UK.
13. NIHR Health Protection Research Unit for Emerging and Zoonotic Infections, Institute of Infection, Veterinary and Ecological Sciences University of Liverpool, Liverpool, L69 7BE, UK.
14. MRC-University of Glasgow Centre for Virus Research, Institute of Infection, Immunity and Inflammation, College of Medical, Veterinary and Life Sciences, University of Glasgow, Glasgow, UK.
15. William Harvey Research Institute, Barts and the London School of Medicine and Dentistry, Queen Mary University of London, London EC1M 6BQ, UK.
16. Centre for Tropical Medicine and Global Health, Nuffield Department of Medicine, University of Oxford, Old Road Campus, Roosevelt Drive, Oxford, OX3 7FZ, UK.
17. Clinical Research Centre at St Vincent's University Hospital, University College Dublin, Dublin, Ireland.
18. Australian and New Zealand Intensive Care Research Centre, Monash University, Melbourne, Australia.
19. Intensive Care Unit, Alfred Hospital, Melbourne, Australia.

- 43 20. Department of Critical Care Medicine, Queen's University and Kingston Health Sciences Centre,  
44 Kingston, ON, Canada.
- 45 21. Department of Anaesthesia and Intensive Care, The Chinese University of Hong Kong, Prince of Wales  
46 Hospital, Hong Kong, China.
- 47 22. Wellcome-Wolfson Institute for Experimental Medicine, Queen's University Belfast, Belfast, Northern  
48 Ireland, UK.
- 49 23. Department of Intensive Care Medicine, Royal Victoria Hospital, Belfast, Northern Ireland, UK.
- 50 24. UCL Centre for Human Health and Performance, London, W1T 7HA, UK.
- 51 25. Centre for Global Health Research, Usher Institute of Population Health Sciences and Informatics,  
52 Teviot Place, Edinburgh EH8 9AG, UK.
- 53 26. Department of Medical Epidemiology and Biostatistics, Karolinska Institutet, Stockholm, Sweden.
- 54 27. Intensive Care National Audit & Research Centre, London, UK.
- 55 28. Great Ormond Street Hospital for Children NHS Foundation Trust, London, UK.
- 56 29. National Heart & Lung Institute, Imperial College London (St Mary's Campus), Norfolk Place, Padding-  
57 ton, London W2 1PG, UK.
- 58 30. University of Liverpool, Liverpool, UK.

59 \* Joint first authorship. These authors contributed equally to this work.

60 *Address for correspondence:* Dr J Kenneth Baillie, Roslin Institute, University of Edinburgh, Easter Bush,  
61 Edinburgh, EH25 9RG, UK.

62 email: [j.k.baillie@ed.ac.uk](mailto:j.k.baillie@ed.ac.uk)

## Abstract

The subset of patients who develop critical illness in Covid-19 have extensive inflammation affecting the lungs<sup>1</sup> and are strikingly different from other patients: immunosuppressive therapy benefits critically-ill patients, but may harm some non-critical cases.<sup>2</sup> Since susceptibility to life-threatening infections and immune-mediated diseases are both strongly heritable traits, we reasoned that host genetic variation may identify mechanistic targets for therapeutic development in Covid-19.<sup>3</sup>

GenOMICC (Genetics Of Mortality In Critical Care, [genomicc.org](http://genomicc.org)) is a global collaborative study to understand the genetic basis of critical illness. Here we report the results of a genome-wide association study (GWAS) in 2244 critically-ill Covid-19 patients from 208 UK intensive care units (ICUs), representing >95% of all ICU beds. Ancestry-matched controls were drawn from the UK Biobank population study and results were confirmed in GWAS comparisons with two other population control groups: the 100,000 genomes project and Generation Scotland.

We identify and replicate three novel genome-wide significant associations, at chr19p13.3 (rs2109069,  $p = 3.98 \times 10^{-12}$ ), within the gene encoding dipeptidyl peptidase 9 (*DPP9*), at chr12q24.13 (rs10735079,  $p = 1.65 \times 10^{-8}$ ) in a gene cluster encoding antiviral restriction enzyme activators (*OAS1*, *OAS2*, *OAS3*), and at chr21q22.1 (rs2236757,  $p = 4.99 \times 10^{-8}$ ) in the interferon receptor gene *IFNAR2*. Consistent with our focus on extreme disease in younger patients with less comorbidity, we detect a stronger signal at the known 3p21.31 locus than previous studies (rs73064425,  $p = 4.77 \times 10^{-30}$ ).

We identify potential targets for repurposing of licensed medications. Using Mendelian randomisation we found evidence in support of a causal link from low expression of *IFNAR2*, and high expression of *TYK2*, to life-threatening disease. Transcriptome-wide association in lung tissue revealed that high expression of the monocyte/macrophage chemotactic receptor *CCR2* is associated with severe Covid-19.

Our results identify robust genetic signals relating to key host antiviral defence mechanisms, and mediators of inflammatory organ damage in Covid-19. Both mechanisms may be amenable to targeted treatment with existing drugs. Large-scale randomised clinical trials will be essential before any change to clinical practice.

## Introduction

Critical illness in Covid-19 is caused, in part, by inflammatory injury affecting the lungs and lung blood vessels.<sup>4,5</sup> There are therefore at least two distinct biological components to mortality risk: susceptibility to viral infection, and propensity to develop harmful pulmonary inflammation. Susceptibility to life-threatening infections<sup>6</sup> and immune-mediated diseases are both strongly heritable. In particular, susceptibility to respiratory viruses<sup>7</sup> such as influenza<sup>8</sup> is heritable and known to be associated with specific genetic variants.<sup>9</sup> In Covid-19, one genetic locus, 3p21.31 has been repeatedly associated with hospitalisation.<sup>10,11</sup> As with other viral illnesses,<sup>12</sup> there are several examples of loss-of-function variants affecting essential immune processes that lead to severe disease in young people: for example *TLR7* defects among 4 cases with severe disease.<sup>13</sup> Understanding the molecular mechanisms of critical illness in Covid-19 may reveal new therapeutic targets to modulate this host immune response to promote survival.<sup>3</sup>

There is now strong evidence that critical illness caused by Covid-19 is qualitatively different from mild or moderate disease, even among hospitalised patients. There are multiple distinct disease phenotypes with differing patterns of presenting symptoms<sup>14</sup> and marked differential responses to immunosuppressive therapy.<sup>2</sup> In patients without respiratory failure, there is a trend towards harm from treatment with corticosteroids, whereas among patients with critical respiratory failure, there is a very substantial benefit.<sup>2</sup> On this basis, we can consider patients with critical Covid-19 respiratory failure to have distinct pathophysiology.

In the UK, the group of patients admitted to critical care is relatively homogeneous, with profound hypoxaemic respiratory failure being the archetypal presentation.<sup>15</sup> The active disease process in these patients is strikingly responsive to corticosteroid therapy<sup>16</sup> and is characterised by pulmonary inflammation including diffuse alveolar damage, macrophage/monocyte influx, mononuclear cell pulmonary artery vasculitis and microthrombus formation.<sup>4,5</sup>

110 Host-directed therapies have long been an aspiration for the treatment of severe disease caused by respiratory  
111 viruses.<sup>17</sup> Identification of genetic loci associated with susceptibility to Covid-19 may lead to specific targets  
112 for repurposing or drug development.<sup>3</sup>

113 The GenOMICC (Genetics Of Mortality In Critical Care, [genomicc.org](http://genomicc.org)) study has been recruiting patients  
114 with critical illness syndromes, including influenza, sepsis, and emerging infections, for 5 years. GenOMICC  
115 works in partnership with Genomics England to study Covid-19. In order to better understand the host  
116 mechanisms leading to life-threatening Covid-19, we performed a genome-wide association study comparing  
117 to controls from population genetic studies in the UK.

## 118 Results

119 Critically-ill cases were recruited through the GenOMICC study in 208 UK Intensive Care Units and hospi-  
120 talised cases through the International Severe Acute Respiratory Infection Consortium (ISARIC) Coronavirus  
121 Clinical Characterisation Consortium (4C) study. Demographic and summary clinical characteristics of the  
122 cohort are described in Table 1. Cases were representative of the UK critically-ill population.<sup>15</sup>

Table 1: Baseline characteristics of patients included. Significant comorbidity was defined as the presence of functionally-limiting comorbid illness in GenOMICC, in the assessment of the treating clinicians. In ISARIC 4C significant comorbidity refers to the presence of any chronic cardiac, lung, kidney, or liver disease, cancer or dementia. Age is shown as mean  $\pm$  standard deviation.

| Patient Characteristics  | GenOMICC (n=2109) |                     | ISARIC 4C (n=134) |                     |
|--------------------------|-------------------|---------------------|-------------------|---------------------|
|                          |                   | <i>missing data</i> |                   | <i>missing data</i> |
| Female sex               | 624 (30%)         |                     | 46 (34%)          |                     |
| Age (yrs, mean $\pm$ SD) | 57.3 $\pm$ 12.1   |                     | 57.3 $\pm$ 2.9    |                     |
| European ancestry        | 1573 (75%)        |                     | 103 (76%)         |                     |
| South Asian ancestry     | 219 (10%)         |                     | 18 (13%)          |                     |
| African ancestry         | 174 (8%)          |                     | 8 (6%)            |                     |
| East Asian ancestry      | 143 (7%)          |                     | 6 (4%)            |                     |
| Significant comorbidity  | 396 (19%)         | 49 (2%)             | 42 (28%)          | 31 (21%)            |
| Invasive ventilation     | 1557 (74%)        | 35 (2%)             | 25 (19%)          | 31 (23%)            |
| Died (60 days)           | 459 (22%)         | 338 (16%)           | 22 (16%)          | 30 (22%)            |

123 DNA was extracted from whole blood and genome-wide genotyping and quality control were performed  
124 according to standard protocols (Materials & Methods). Briefly, genetic ancestry was inferred for unrelated  
125 individuals passing quality control using ADMIXTURE and reference individuals from the 1000 Genomes  
126 project. Imputation was performed using the TOPMed reference panel.<sup>18</sup> Whole genome sequencing was  
127 performed on a subset of 1613 cases, and used to confirm both array-genotyped and imputed genotypes.  
128 From the 4469187 imputed variants that passed all filters after GWAS, 72658 did not pass QC filtering in  
129 WGS data and were removed. Comparing the allele frequencies of each SNP between WGS and imputation,  
130 the correlation of allele frequencies was  $r^2=0.9994$ . All variants with a difference of  $> 5\%$  were removed from  
131 the analysis, leaving 4396207 imputed variants.

132 Ancestry-matched controls not having Covid-19 PCR tests were selected from the large population-based  
133 cohort UK Biobank in a ratio of 5 controls to 1 case. GWAS was carried out separately by ancestry group  
134 using logistic regression in PLINK and accounting for age, sex, postal code deprivation decile and principal  
135 components of ancestry. As well as standard filters for minor allele frequency ( $>0.01$ ), imputation quality  
136 (0.9) and Hardy-Weinberg equilibrium ( $10^{-5}$ ), GWAS results were filtered on allele frequency against the  
137 genome aggregation database (gnomAD), to avoid biases arising from different imputation panels (and arrays)  
138 between cases and controls. The largest ancestry group contained 1676 individuals of European descent  
139 (EUR).

140 Following linkage disequilibrium-based clumping, 15 independent association signals were genome-wide sig-

141 nificant at  $p < 5 \times 10^{-8}$ . Eight of these were successfully validated using a GWAS using two independent  
 142 population genetic studies (100,000 genomes and Generation Scotland) as controls (Table 2).

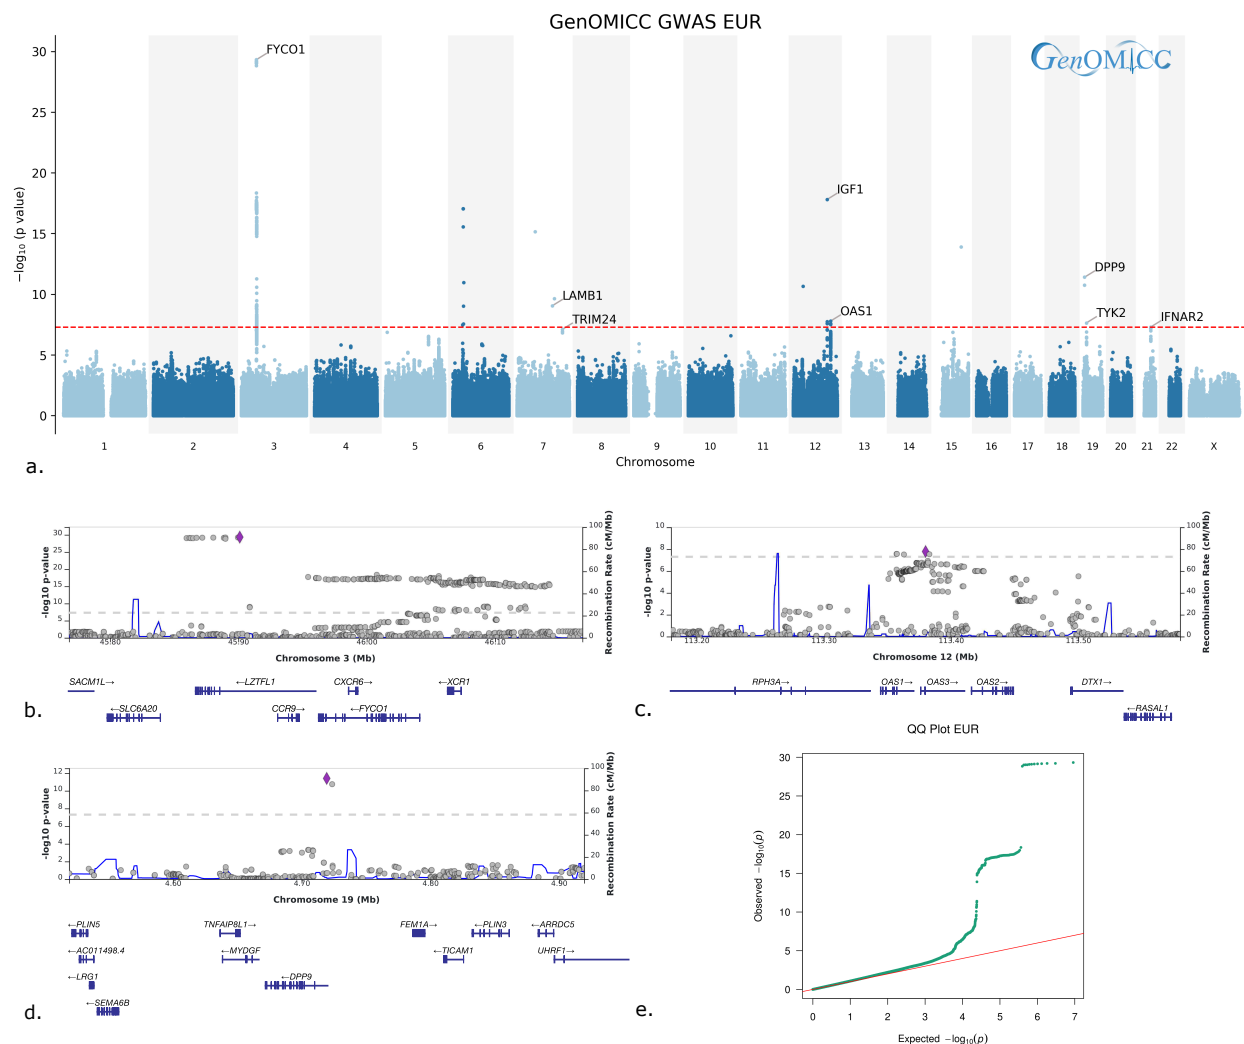

Figure 1: Summary of GWAS results for EUR ancestry group in GenOMICC. *a*. Manhattan plot showing SNP-level p-values for genome-wide significant associations in largest ancestry group, EUR (red horizontal line shows genome-wide significance at  $-\log_{10}(5 \times 10^{-8})$ ) *b-d*. LocusZoom<sup>19</sup> plots showing genomic regions around protein-coding genes. *e*. Quantile-quantile (QQ) plot.

## 143 GWAS results

Table 2: Lead variants from independent genome-wide significant regions. Full summary statistics are provided in Supplementary Information. chr:pos - chromosome and position of the top SNP (build 37); Risk - risk allele; Other - other allele; RAF - risk allele frequency; OR - effect size (odds ratio) of the risk allele; locus - gene nearest to the top SNP.

| SNP         | chr:pos(b37) | Risk | Other | RAF   | OR   | P                      | Locus         |
|-------------|--------------|------|-------|-------|------|------------------------|---------------|
| rs73064425  | 3:45901089   | T    | C     | 0.08  | 2.14 | $4.77 \times 10^{-30}$ | <i>LZTFL1</i> |
| rs9380142   | 6:29798794   | A    | G     | 0.70  | 1.30 | $3.23 \times 10^{-8}$  | <i>HLA-G</i>  |
| rs143334143 | 6:31121426   | A    | G     | 0.079 | 1.85 | $8.82 \times 10^{-18}$ | <i>CCHCR1</i> |

| SNP        | chr:pos(b37) | Risk | Other | RAF  | OR   | P                      | Locus             |
|------------|--------------|------|-------|------|------|------------------------|-------------------|
| rs3131294  | 6:32180146   | G    | A     | 0.87 | 1.45 | $2.81 \times 10^{-8}$  | <i>NOTCH4</i>     |
| rs10735079 | 12:113380008 | A    | G     | 0.64 | 1.29 | $1.65 \times 10^{-8}$  | <i>OAS3</i>       |
| rs74956615 | 19:10427721  | A    | T     | 0.06 | 1.59 | $2.31 \times 10^{-8}$  | <i>ICAM5/TYK2</i> |
| rs2109069  | 19:4719443   | A    | G     | 0.33 | 1.36 | $3.98 \times 10^{-12}$ | <i>DPP9</i>       |
| rs2236757  | 21:34624917  | A    | G     | 0.29 | 1.28 | $5.00 \times 10^{-8}$  | <i>IFNAR2</i>     |

144 Since no study of critical illness in Covid-19 of sufficient size is available, replication was sought in the Covid-  
 145 19 Host Genetics Initiative (HGI) hospitalised COVID-19 versus population analysis, with UK Biobank cases  
 146 excluded. In addition to the locus on chr3 already reported (rs73064425, OR=2.14, discovery  $p=4.77 \times$   
 147  $10^{-30}$ ), we found robust replication for the novel associations in three loci from GenOMICC: a locus on chr12  
 148 in the *OAS* gene cluster (rs74956615, OR=1.59, discovery  $p=1.65 \times 10^{-8}$ ) and in *DPP9* on chr19 (rs2109069,  
 149 OR=1.36, discovery  $p=3.98 \times 10^{-12}$ ) and locus on chromosome 21, containing gene IFNAR2 (rs2236757,  
 150 OR=1.28,  $p=5 \times 10^{-8}$ ) (Table 3).

## 151 Replication

Table 3: Replication in external data from Covid-19 HGI. chr:pos - chromosome and position of the top SNP (build 37); Risk - risk allele; Other - other allele; beta - effect size of the risk allele; OR - odds ratio; locus - gene nearest to the top SNP; gcc.eur - GenOMICC study, European ancestry; hgi - Covid-19 human genetics initiative; \* Bonferroni significant.

| SNP         | chr:pos (b37) | Risk | Other | beta gcc.eur | P gcc.eur             | beta hgi | P hgi                   | Locus             |
|-------------|---------------|------|-------|--------------|-----------------------|----------|-------------------------|-------------------|
| rs73064425  | 3:45901089    | T    | C     | 0.76         | $4.8 \times 10^{-30}$ | 0.53     | $1.6 \times 10^{-12}$ * | <i>LZTFL1</i>     |
| rs9380142   | 6:29798794    | A    | G     | 0.26         | $3.2 \times 10^{-8}$  | 0.036    | 0.46                    | <i>HLA-G</i>      |
| rs143334143 | 6:31121426    | A    | G     | 0.62         | $8.8 \times 10^{-18}$ | 0.064    | 0.34                    | <i>CCHCR1</i>     |
| rs3131294   | 6:32180146    | G    | A     | 0.38         | $2.8 \times 10^{-8}$  | 0.1      | 0.2                     | <i>NOTCH4</i>     |
| rs10735079  | 12:113380008  | A    | G     | 0.26         | $1.6 \times 10^{-8}$  | 0.14     | 0.0027*                 | <i>OAS3</i>       |
| rs2109069   | 19:4719443    | A    | G     | 0.31         | $4 \times 10^{-12}$   | 0.17     | 0.00031*                | <i>DPP9</i>       |
| rs74956615  | 19:10427721   | A    | T     | 0.46         | $2.3 \times 10^{-8}$  | 0.14     | 0.4                     | <i>ICAM5/TYK2</i> |
| rs2236757   | 21:34624917   | A    | G     | 0.25         | $5 \times 10^{-8}$    | 0.18     | 0.00016*                | <i>IFNAR2</i>     |

152 To further increase power for exploratory downstream analyses meta-analysis of GENOMICC and HGI was  
 153 performed using inverse-variance meta-analysis in METAL,<sup>20</sup> discovering 2 additional loci, one on chromo-  
 154 some 8, near *HAS2* (rs10087754, OR=1.19, meta-analysis  $p=3.1 \times 10^{-8}$ ) and another on chromosome 19,  
 155 near *TYK2* (rs11085727, OR=1.25,  $p=1.57 \times 10^{-10}$ ) (Table 4).

Table 4: Meta-analysis of GenOMICC (EUR) and HGI hospitalized covid vs. population studies. SNP - the strongest SNP in the locus; ; A1 - effect allele; A2 - alternative allele; beta - effect size of the effect allele; nearest gene - gene nearest to the top SNP.

| SNP         | A1 | A2 | beta eur | p eur                 | beta hgi.meta | OR hgi.meta | p hgi.meta            | Gene            |
|-------------|----|----|----------|-----------------------|---------------|-------------|-----------------------|-----------------|
| rs67959919  | A  | G  | 0.76     | $7.1 \times 10^{-30}$ | 0.66          | 1.9         | $7.3 \times 10^{-38}$ | <i>LZTFL1</i>   |
| rs143334143 | A  | G  | 0.62     | $8.8 \times 10^{-18}$ | 0.31          | 1.4         | $7 \times 10^{-10}$   | <i>CCHCR1</i>   |
| rs9501257   | G  | A  | 0.49     | $1.1 \times 10^{-11}$ | 0.31          | 1.4         | $3.8 \times 10^{-9}$  | <i>HLA-DPB1</i> |
| rs622568    | C  | A  | 0.45     | $7.1 \times 10^{-16}$ | 0.29          | 1.3         | $7 \times 10^{-11}$   | <i>VSTM2A</i>   |
| rs10087754  | T  | A  | 0.19     | $7.6 \times 10^{-6}$  | 0.18          | 1.2         | $3.1 \times 10^{-8}$  | <i>HAS2-ASI</i> |
| rs10860891  | C  | A  | 0.55     | $1.6 \times 10^{-18}$ | 0.3           | 1.3         | $7.5 \times 10^{-10}$ | <i>IGF1</i>     |
| rs4766664   | G  | T  | 0.25     | $3.1 \times 10^{-8}$  | 0.2           | 1.2         | $2.5 \times 10^{-9}$  | <i>OAS1</i>     |
| rs2277732   | A  | C  | 0.3      | $1.8 \times 10^{-11}$ | 0.25          | 1.3         | $1.6 \times 10^{-13}$ | <i>DPP9</i>     |



| SNP        | A1 | A2 | beta eur | p eur                | beta hgi.meta | OR hgi.meta | p hgi.meta            | Gene          |
|------------|----|----|----------|----------------------|---------------|-------------|-----------------------|---------------|
| rs11085727 | T  | C  | 0.24     | $1.3 \times 10^{-7}$ | 0.22          | 1.2         | $1.6 \times 10^{-10}$ | <i>TYK2</i>   |
| rs13050728 | T  | C  | 0.23     | $3 \times 10^{-7}$   | 0.21          | 1.2         | $2.5 \times 10^{-10}$ | <i>IFNAR2</i> |

## 156 Mendelian randomisation

157 Mendelian randomisation provides evidence for a causal relationship between an exposure variable and an  
158 outcome, given a set of assumptions.<sup>21</sup> We employ it here to assess the evidence in support of causal effects  
159 of RNA expression of various genes on the odds of critical Covid-19.

160 We specified an *a priori* list of target genes that relate to the mechanism of action of many host-targeted drugs  
161 that have been proposed for the treatment of Covid-19 (Supp Table 1). Seven of these targets had a suitable  
162 locally-acting eQTL in GTEx(v7). Of these, *IFNAR2* remained significant after Bonferroni correcting for  
163 multiple testing for 7 tests (beta -1.49, standard error 0.52, p-value 0.0043), with equivocal evidence of  
164 heterogeneity (HEIDI<sup>22</sup> p-value = 0.0150;  $0.05/7 < p\text{-value} < 0.05$ ; 6 SNPs). This Mendelian randomisation  
165 result successfully replicated in the results of COVID19-hg (ANA\_B2\_V2; hospitalized covid vs. population;  
166 UK Biobank excluded): beta -1.37, standard error 0.51, p-value 0.0066 (1 test).

167 We then performed transcriptome-wide Mendelian randomisation to quantify support for *unselected* genes  
168 as potential therapeutic targets. Instruments were available for 4,614 unique Ensembl gene IDs. No genes  
169 were statistically significant after correcting for multiple comparisons in this analysis (4,614 tests). After  
170 conservative filtering for heterogeneity (HEIDI p-value  $> 0.05$ ), the smallest Mendelian randomisation p-  
171 value was 0.00049 for a variant at chr19:10466123 affecting expression of *TYK2*. 9 other genes with nominally  
172 significant Mendelian randomisation p-values ( $p < 0.005$ ) were then tested for independent external evidence  
173 (Supplementary Information). We found that *TYK2* had a significant independent Mendelian randomisation  
174  $p = 0.0022$  in this second set (Bonferroni-corrected significance threshold = 0.006). In both cases it should  
175 be noted that this is not a complete replication, because the same GTEx expression data was used for both  
176 analyses.

## 177 TWAS

178 We performed TWAS<sup>23,24</sup> to link GWAS results to tissue-specific gene expression data by inferring gene  
179 expression from known genetic variants that are associated with transcript abundance (expression quantitative  
180 trait loci, eQTL). For this analysis we used GTExv8 data for two disease-relevant tissues chosen *a priori*:  
181 whole blood and lung (Figure 3), and performed a combined meta-TWAS analysis<sup>25</sup> to detect predicted  
182 expression differences across both tissues.

183 We discovered 18 genes with genome-wide significant differences in predicted expression compared to controls  
184 (Supplementary Information). This included 4 genes with differential predicted expression in lung tissue  
185 (Figure 3; 3 on chr3: *CCR2*, *CCR3* and *CXCR6*, and 1 on chr5: *MTA2B*).

## 186 Genetic correlations, tissue, and cell-type associations

187 We tested for genetic correlations with other traits, that is the degree to which the underlying genetic  
188 components are shared with severe Covid-19. Using the high-definition likelihood (HDL) method,<sup>26</sup> we  
189 identified significant negative genetic correlations with educational attainment and intelligence. Significant  
190 positive genetic correlations were detected for a number of adiposity phenotypes including body mass index  
191 and leg fat, as well as pulse rate, neck/shoulder pain, thyroxine, and lansoprazole medications.

192 Consistent with GWAS results from other infectious and inflammatory diseases,<sup>27</sup> there was a significant  
193 enrichment of strongly-associated variants in promoters and enhancers, particularly those identified by the  
194 EXaC study as under strong evolutionary selection (Supplementary Information).<sup>28</sup> The strongest tissue type  
195 enrichment was in spleen, followed by pancreas (Supplementary Information).

It is made available under a [CC-BY-NC-ND 4.0 International license](https://creativecommons.org/licenses/by-nc-nd/4.0/).

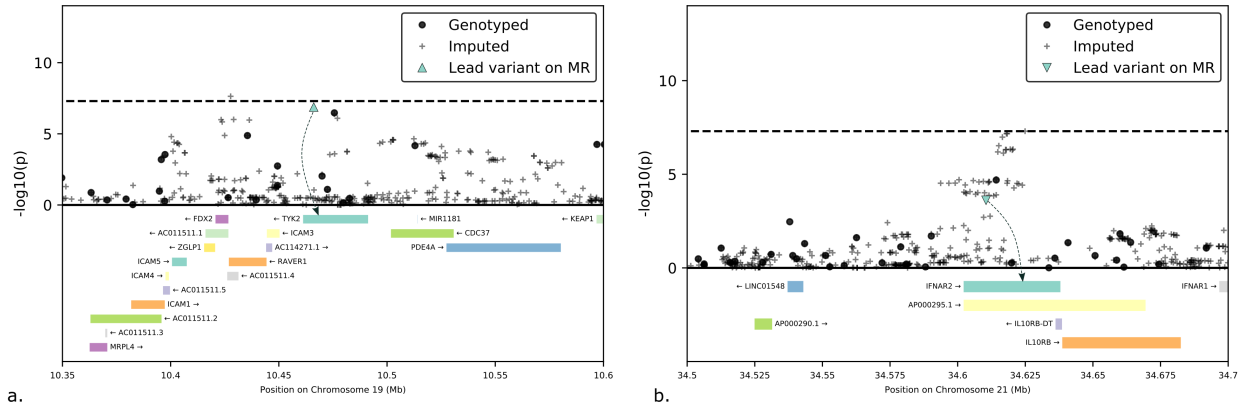

Figure 2: Detail of the TYK2 and IFNAR2 loci showing location of instrumental variables used for Mendelian randomisation. x-axes: genomic position with gene locations marked; y-axes: GenOMICC GWAS  $-\log_{10}(p)$ -values; dashed line: genome-wide significance at  $-\log_{10}(5 \times 10^{-8})$ ; blue triangles: variants used as the instrumental variables for MR, for TYK2 and IFNAR2, respectively. A detailed description of the method of instrument selection is provided in Materials and Methods.

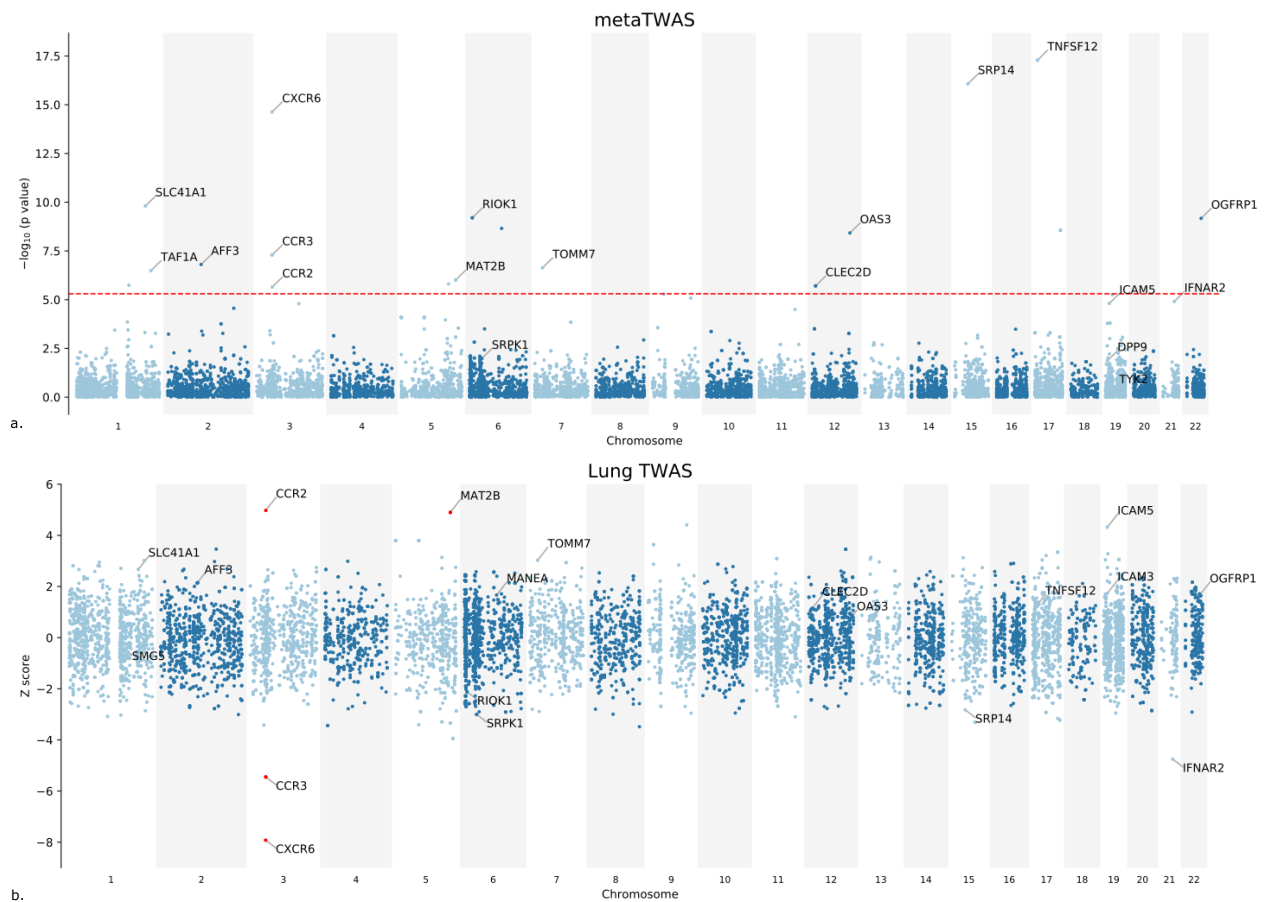

Figure 3: Summary of TWAS results. *a.* Gene-level Manhattan plot showing results from meta-TWAS analysis across tissues. *b.* z-scores showing direction of effect for genotype-inferred expression of transcripts encoding protein-coding genes in lung tissue (GTExv8). Red highlighting indicates genome-wide significance at  $p < 5 \times 10^{-6}$ .



## Discussion

We have discovered and replicated significant genetic associations with life-threatening Covid-19 (Figure 1). Our focus on critical illness increases the probability that some of these associations relate to the later, immune-mediated disease associated with respiratory failure requiring invasive mechanical ventilation.<sup>2</sup> Importantly, the GWAS approach is unbiased and genome-wide, enabling the discovery of completely new pathophysiological mechanisms. Because genetic variation can be used to draw a causal inference, genetic evidence in support of a therapeutic target substantially improves the probability of successful drug development.<sup>29</sup> In particular, Mendelian randomisation occupies a unique position in the hierarchy of clinical evidence.<sup>30</sup>

Patients admitted to intensive care units in the UK during the first wave of Covid-19 were, on average, younger and less burdened by comorbid illness than the hospitalised population.<sup>15</sup> Compared to other countries, UK ICU admission tends to occur at a higher level of illness severity,<sup>31</sup> reflected in the high rate of invasive mechanical ventilation use in our cohort (73%; Table 1). Therefore, the population studied here are defined by their propensity to critical respiratory failure due to Covid-19. GenOMICC recruited in 208 intensive care units (covering more than 95% of UK ICU capacity), ensuring that a broad spread across the genetic ancestry of UK patients was included (Supplementary Information).

For external replication, the nearest comparison is the hospitalised vs population analysis in the Covid-19 Host Genetics initiative, which has been generously shared with the international community. Likewise, full summary statistics from GenOMICC are openly available in order to advance the rate of discovery.

Despite the differences in case definitions, novel associations from our study of critical illness replicate robustly in the hospitalised case study (Table 3). Separately, the Mendelian randomisation results implying a causal role for *IFNAR2* and *TYK2* are also statistically significant in this cohort. Our findings reveal that critical illness in Covid-19 is related to at two biological mechanisms: innate antiviral defences, which are known to be important early in disease (*IFNAR2* and *OAS* genes), and host-driven inflammatory lung injury, which is a key mechanism of late, life-threatening Covid-19 (*DPP9*, *TYK2* and *CCR2*).<sup>2</sup>

Interferons are canonical host antiviral signalling mediators, and stimulate release of many essential components of the early host response to viral infection.<sup>32</sup> Consistent with a beneficial role for type I interferons, increased expression of the interferon receptor subunit *IFNAR2* reduced the odds of severe Covid-19 with Mendelian randomisation discovery  $p = 0.0043$  (7 tests); replication  $p = 0.0066$  (1 test). Within the assumptions of Mendelian randomisation, this represents evidence for a protective role for *IFNAR2* in Covid-19. We deemed this gene to be therapeutically-informative *a priori* because it is a target for exogenous interferon treatment. with fatal sequelae from live-attenuated measles virus in humans<sup>33,34</sup> and with influenza in mice.<sup>35</sup>

The variant rs10735079 (chr12,  $p = 1.65 \times 10^{-8}$ ) lies in the oligoadenylate synthetase (*OAS*) gene cluster (*OAS1*, *OAS2* and *OAS3*; Figure 1). TWAS also (Figure 3) detects significant associations in these genes (Figure 3). *OAS* genes are inducible by type I interferons. These genes encode enzymes which activate an effector enzyme, RNase L, which degrades double-stranded RNA,<sup>36</sup> a replication intermediate of coronaviruses.<sup>37</sup> *OAS1* variants were implicated in susceptibility to SARS-CoV in candidate gene association studies in Vietnam<sup>38</sup> and China.<sup>39</sup>

The association in 19p13.3 (rs2109069,  $p = 3.98 \times 10^{12}$ ) is an intronic variant in the gene encoding dipeptidyl peptidase 9 (*DPP9*). Variants in this locus are associated with idiopathic pulmonary fibrosis<sup>40</sup> and interstitial lung disease.<sup>41</sup> *DPP9* encodes a serine protease with diverse intracellular functions, including cleavage of the key antiviral signalling mediator CXCL10,<sup>42</sup> and plays a key role in antigen presentation.<sup>43</sup>

Since opportunities for therapeutic intervention, particularly experimental therapy, are more abundant in later, more severe disease, it is important that our results also reveal genes that may act to drive inflammatory organ injury. *TYK2* is one of 4 gene products listed in the druggable genome Targets Central Resource Database<sup>44</sup> as a target for baricitinib, one of the nine candidate drugs we used in the creation of our *a priori* target list (Supplementary Table 1). However, since we did not *a priori* include *TYK2* on the final set of genes for focused Mendelian randomisation, we use a significance threshold corrected for the full set of comparisons: discovery  $p = 0.00049$  (4614 tests); replication  $p = 0.0022$  (9 tests).

We replicate the finding of Ellinghaus *et al.* at 3p21.31.<sup>11</sup> The extremely small p-value at this locus ( $p=4.77$

245  $\times 10^{-30}$ ) may reflect the strength of the signal, the large size of our study, our focus on extreme severity.  
246 The 3p21.31 locus is populated by a number of genes with mechanisms of action that could plausibly explain  
247 an association. Our systematic review and meta-analysis of experimental data on betacoronavirus infection  
248 from other sources provides moderate biological support for *FYCO1*, although the additional information  
249 comes mostly from *in vitro* model systems.<sup>45</sup>

250 TWAS results show that variants in this region confer genome-wide significant differences in predicted ex-  
251 pression of *CXCR6*, *CCR2* and *CCR3* (Supplementary Information). Association with critical illness for  
252 genotype-inferred *CCR2* (CC-chemokine receptor 2) expression is particularly strong in lung tissue(Figure 3).  
253 *CCR2* promotes monocyte/macrophage chemotaxis towards sites of inflammation, and there is increased ex-  
254 pression of the canonical ligand for *CCR2*, monocyte chemoattractant protein (MCP-1), in bronchoalveolar  
255 lavage fluid from the lungs of Covid-19 patients during mechanical ventilation.<sup>46</sup> Circulating MCP-1 concen-  
256 trations are associated with more severe disease.<sup>47</sup> Anti-*CCR2* monoclonal antibody therapy in treatment of  
257 rheumatoid arthritis is safe.<sup>48</sup>

258 The *ABO* locus was also previously associated with Covid-19,<sup>11</sup> but was not significant in our study (smallest  
259  $p=1.30 \times 10^{-3}$ , chr9:136115876; Supplementary Information). This does not rule out the possibility of a true  
260 association, but other possible explanations include differences between case and control populations in each  
261 study.

262 Analysis of shared heritability highlights adiposity and educational attainment: genetically increased body  
263 mass index (BMI) and genetically decreased educational attainment are both associated with higher risk of  
264 severe Covid. This does not imply a causal relationship, as a number of biases may be at play, but may  
265 reflect the fact that increased BMI and lower socio-economic status are strong risk factors for Covid-19,<sup>49,50</sup>  
266 or the fact that UK Biobank participants were disproportionately drawn from a high socio-economic status  
267 group.<sup>51</sup>

268 There is an urgent need to deepen these findings through further studies of this type, with harmonised  
269 integration across multiple studies. We continue to recruit to the GenOMICC study, in the expectation that  
270 additional associations exist and can be detected with larger numbers of cases. Future studies using whole  
271 genome sequencing will add spatial resolution on the genome and better detection rare variants. Effect sizes  
272 are likely to be higher in GenOMICC because the cohort is strongly enriched for immediately life-threatening  
273 disease in patients who are either receiving invasive mechanical ventilation, or considered by the treating  
274 physicians to be at high risk of requiring mechanical support. With 2244 cases we have statistical power  
275 to detect strong effects, such as the highly-significant locus at 3p21.31, as well as moderate genome-wide  
276 significant findings with external replication at *DPP9*, *OAS* and *IFNAR2*.

277 Because of the urgency of completing and reporting this work, we have drawn controls from population  
278 genetic studies who were genotyped using different technology from the cases. We mitigated the consequent  
279 risk of false-positive associations driven by genotyping errors by genotyping the majority of our subjects using  
280 two different methods, and by verifying significant associations using two separate control groups (100,000  
281 genomes and Generation Scotland). The success of these mitigations is demonstrated by robust replication  
282 of our top hits in external studies.

283 We have discovered new and highly plausible genetic associations with critical illness in Covid-19. Some of  
284 these associations lead directly to potential therapeutic approaches to augment interferon signalling, antago-  
285 nise monocyte activation and infiltration into the lungs, or specifically target harmful inflammatory pathways.  
286 While this adds substantially to the biological rationale underpinning specific therapeutic approaches, each  
287 treatment must be tested in large-scale clinical trials before entering clinical practice.

## 288 **Materials and methods**

### 289 **Recruitment**

290 2,636 patients recruited to the GenOMICC study ([genomicc.org](http://genomicc.org)) had confirmed Covid-19 according to local  
291 clinical testing and were deemed, in the view of the treating clinician, to require continuous cardiorespiratory  
292 monitoring. In UK practice this kind of monitoring is undertaken in high-dependency or intensive care  
293 units. An additional 134 patients were recruited through ISARIC 4C ([isaric4c.net](http://isaric4c.net)) - these individuals had  
294 confirmed Covid-19 according to local clinical testing and were deemed to require hospital admission. Both  
295 studies were approved by the appropriate research ethics committees (Scotland 15/SS/0110, England, Wales  
296 and Northern Ireland: 19/WM/0247). Current and previous versions of the study protocol are available at  
297 [genomicc.org/protocol](http://genomicc.org/protocol).

### 298 **Genotyping**

299 DNA was extracted from whole blood using Nucleon Kit (Cytiva) with the BACC3 protocol. DNA samples  
300 were re-suspended in 1 ml TE buffer pH 7.5 (10mM Tris-Cl pH 7.5, 1mM EDTA pH 8.0). The yield of the  
301 DNA was measured using Qubit and normalised to 50ng/ $\mu$ l before genotyping.

302 Genotyping was performed using the Illumina Global Screening Array v3.0 + multi-disease beadchips  
303 (GSAMD-24v3-0-EA) and Infinium chemistry. In summary this consists of three steps: (1) whole genome  
304 amplification, (2) fragmentation followed by hybridisation, and (3) single-base extension and staining. For  
305 each of the samples, 4  $\mu$ l of DNA normalised to 50ng/ $\mu$ l was used. Each sample was interrogated on the  
306 arrays against 730,059 SNPs. The Arrays were imaged on an Illumina iScan platform and genotypes were  
307 called automatically using GenomeStudio Analysis software v2.0.3, GSAMD-24v3-0-EA\_20034606\_A1.bpm  
308 manifest and cluster file provided by manufacturer.

309 In 1667 cases, genotypes and imputed variants were confirmed with Illumina NovaSeq 6000 whole genome  
310 sequencing. Samples were aligned to the human reference genome hg38 and variant called to GVCF stage  
311 on the DRAGEN pipeline (software v01.011.269.3.2.22, hardware v01.011.269) at Genomics England. Vari-  
312 ants were genotyped with the GATK GenotypeGVCFs tool v4.1.8.1,<sup>52</sup> filtered to minimum depth 8X (95%  
313 sensitivity for heterozygous variant detection,<sup>53</sup>) merged and annotated with allele frequency with bcftools  
314 v1.10.2.

### 315 **Quality control**

316 Genotype calls were carefully examined within GenomeStudio using manufacturer and published<sup>54</sup> recom-  
317 mendations, after excluding samples with low initial call rate (<90%) and reclustering the data thereafter.  
318 Briefly, X and Y markers calls were all visually inspected and curated if necessary, as were those for au-  
319 tosomal markers with minor allele frequency > 1% displaying low Gentrain score, cluster separation, and  
320 excess or deficit of heterozygous calls. Genotype-based sex determination was performed in GenomeStudio  
321 and samples excluded if not matching records expectation. Five individuals with XXY genotypes were also  
322 detected and excluded for downstream GWAS analyses. Genotypes were exported, in genome reference con-  
323 sortium human build 37 (GRChb37) and Illumina “source” strand orientation, using the GenotypeStudio  
324 `plink-input-report-plugin-v2-1-4`. A series of filtering steps was then applied using PLINK 1.9 leaving  
325 2799 individuals and 479095 variants for further analyses (exclusion of samples with call rate < 95%, selection  
326 of variants with call rate > 99% and minor allele frequency (MAF) > 1% and final samples selection using  
327 a call rate > 97%).

### 328 **Kinship**

329 Kinship and ancestry inference were calculated following UK Biobank<sup>51</sup> and 1M veteran program.<sup>55</sup> First King  
330 2.1<sup>56</sup> was used to find duplicated individuals which have been recruited by two different routes. The analysis  
331 flagged 56 duplicated pairs, from which one was removed according to genotyping quality (GenomeStudio  
332 p50GC score or/and individual call rate). This leaves a set of 2734 unique individuals.

333 Regions of high linkage disequilibrium (LD) defined in the UK Biobank<sup>51</sup> were excluded from the analy-  
334 sis, as well as SNPs with MAF<1% or missingness >1%. King 2.1 was used to construct a relation-  
335 ship matrix up to 3rd degree using the King command `--kinship --degree 3` and then the function  
336 `largest_independent_vertex_set()` from the `igraph` tool[<http://igraph.sf.net>] was used to create a first  
337 set of unrelated individuals. Principal component analysis (PCA) was conducted with `gcta 1.9`<sup>57</sup> in the set  
338 of unrelated individuals with pruned SNPs using a window of 1000 markers, a step size of 80 markers and an  
339  $r^2$  threshold of 0.1. SNPs with large weights in PC1, PC2 or PC3 were removed, keeping at least 2/3 of the  
340 number of pruned SNPs to keep as an input of the next round of King 2.1. The second round of King 2.1 was  
341 run using the SNPs with low weights in PC1, PC2 and PC3 to avoid overestimating kinship in non-european  
342 individuals. After this round 2718 individuals were considered unrelated up to 3rd degree.

### 343 Genetic ancestry

344 Unrelated individuals from the 1000 Genome Project dataset were calculated using the same procedure  
345 described above, and both datasets were merged using the common SNPs. The merged genotyped data  
346 was pruned with `plink` using a window of 1000 markers a step size of 50 and a  $r^2$  of 0.05, leaving 92K  
347 markers that were used to calculate the 20 first principal components with `gcta 1.9`. Ancestry for genomicc  
348 individuals was inferred using `ADMIXTURE`<sup>58</sup> populations defined in 1000 genomes. When one individual  
349 had a probability > 80% of pertaining to one ancestry, then the individual was assigned to this ancestry,  
350 otherwise the individual was assigned to admix ancestry as in the 1M veteran cohort.<sup>55</sup> According to this  
351 criterion there are 1818 individuals from European ancestry, 190 from African ancestry, 158 from East Asian  
352 ancestry, 254 from South Asian ancestry, and 301 individuals with admixed ancestry (2 or more).

### 353 Imputation

354 Genotype files were converted to plus strand and SNPs with Hardy-Weinberg Equilibrium (HWE) p-  
355 value< $10^{-6}$  were removed. Imputation was calculated using the TOPMed reference panel.<sup>18</sup> and results were  
356 given in `grch38` human reference genome and plus strand. The imputed dataset was filtered for monogenic  
357 and low imputation quality score ( $r^2 < 0.4$ ) using `BCFtools 1.9`. To perform GWAS, files in VCF format were  
358 further filtered for  $r^2 > 0.9$  and converted to BGEN format using `QCtools 1.3`.<sup>59</sup>

359 UK Biobank imputed variants with imputation score >0.9 and overlapping our set of variants (n=5,981,137)  
360 were extracted and merged with GenOMICC data into a single BGEN file containing cases and controls using  
361 `QCtools 1.3`.

### 362 GWAS

363 Individuals with a positive Covid-19 test or suspected Covid-19 when they were admitted in the hospital  
364 were included in the GWAS as cases. Related individuals to degree 3 were removed. 13 individuals with  
365 American ancestry were removed as the sample size provided insufficient power to perform a reliable GWAS  
366 for this group. The final dataset includes 2244 individuals: 1676 individuals from European ancestry, 149  
367 individuals from East Asian ancestry, 237 individuals from South Asian ancestry and 182 individuals from  
368 African ancestry (Table 1). If age or deprivation status were missing for some individuals, the value was set  
369 to the mean of their ancestry. GWAS were performed separately for each ancestry group.

370 Tests for association between case-control status and allele dosage at individuals SNPs were performed by  
371 fitting logistic regression models using `PLINK`.<sup>60</sup> Independent analyses were performed for each ethnic group.  
372 All models included sex, age, mean centered age squared, deprivation score decile of residential postcode, and  
373 the first 10 genomic principal components as covariates.

374 Genomic principal components were computed on the combined sample of all UK Biobank and GenOMICC  
375 participants. Specifically, 456,750 genetic variants were identified which were shared between the variants  
376 contained in the called genotypes in the GenOMICC dataset and imputed UK Biobank genotypes, which  
377 had an information score above 0.95 and a minor allele frequency above 1%. After merging genotypes at  
378 these variants, variants were removed which had a minor allele frequency below 2.5%, a missingness rate  
379 above 1.5%, showed departure from Hardy-Weinberg equilibrium with a p value below  $10^{-50}$ , or which were

380 within previously identified regions of high linkage disequilibrium within UK Biobank. After LD-pruning  
381 of the remaining variants to a maximum  $r^2$  of 0.01 based on a 1000 variant window moving in 50 variants  
382 steps, using the PLINK indep-pairwise command and yielding 13,782 SNPs, the leading 20 genomic principal  
383 components were computed using FlashPCA2.<sup>61</sup>

384 GWAS results were filtered for  $MAF > 0.01$ , variant genotyping rate  $> 0.99$  and HWE p-value  $> 10^{-50}$  for each  
385 ethnicity. An extra filter was added to avoid bias for using a different genotyping method and imputation  
386 panel between controls and cases. This could not be controlled for using regression because all cases and  
387 all controls were genotyped using different methods. MAF for each ancestry were compared between UK  
388 Biobank and gnomAD hg38 downloaded in August 2020.<sup>62</sup> SNPs were removed from the GWAS results  
389 specifically for each ethnicity following these two rules: (a) In SNPs with  $MAF > 10\%$  in gnomAD, an absolute  
390 difference of 5% between gnomAD and UK biobank controls MAF (b) In SNPs with  $MAF < 10\%$  in gnomAD,  
391 a difference  $> 25\%$  gnomAD MAF, between UK Biobank controls and gnomAD. To calculate differences  
392 between UK Biobank European individuals and gnomAD allele frequencies, non-Finnish-europeans gnomAD  
393 allele frequencies were used, as European UK Biobank controls are mainly non-Finnish.

394 **Deprivation score** The UK Data Service provides measures of deprivation based on Census Data and  
395 generated per postcode. The latest version of the Deprivation Scores were published in 2017 and are based  
396 on the 2011 census. Since only partial postcodes were available for most samples we were unable to use these  
397 indices directly. However, we generated an approximation to the scores by calculating an average weighted  
398 by population count across the top-level postcode areas.

399 The initial input file was part of the aggregated census data identified by DOI:10.5257/census/aggregate-  
400 2011-2.

401 Specifically the postcode data were downloaded from:

402 [http://s3-eu-west-1.amazonaws.com/statistics.digitalresources.jisc.ac.uk/dkan/files/Postcode\\_Counts\\_and](http://s3-eu-west-1.amazonaws.com/statistics.digitalresources.jisc.ac.uk/dkan/files/Postcode_Counts_and_Deprivation_Ranks/postcodes.zip)  
403 [\\_Deprivation\\_Ranks/postcodes.zip](http://s3-eu-west-1.amazonaws.com/statistics.digitalresources.jisc.ac.uk/dkan/files/Postcode_Counts_and_Deprivation_Ranks/postcodes.zip)

404 Population count and deprivation score for each published postcode were extracted and weighted average  
405 score calculated for each top-level postcode. We further categorised each top-level postcode score into decile  
406 and quintile bins for more coarse-grained analyses.

## 407 Whole Genome Sequencing

408 Whole Genome Sequencing (WGS) gVCF files were obtained for the 1667 individuals for which we had whole  
409 genome sequence data. Variants overlapping the positions of the imputed variants were called using GATk  
410 and variants with  $depth < 8$  (the minimum depth for which 95% coverage can be expected) were filtered.  
411 Individual VCF files were joined in a multi-sample VCF file for comparison with imputed variants. 1613  
412 of these 1667 were used in the final GWAS. Samples were filtered and variants annotated using bcftools 1.9.  
413 VCF files obtained from imputation were processed in an identical manner. Alternative allele frequency was  
414 calculated with PLINK 2.0<sup>63</sup> for both WGS and imputed data.

## 415 Controls

### 416 UK Biobank

417 UK Biobank participants were considered as potential controls if they were not identified by the UK  
418 Biobank as outliers based on either genotyping missingness rate or heterogeneity, and their sex inferred from  
419 the genotypes matched their self-reported sex. For these individuals, information on sex (UKBID 31), age,  
420 ancestry, and residential postcode deprivation score decile was computed. Specifically, age was computed  
421 as age on April 1st, 2020 based on the participant's birth month (UKBID 34) and year (UKBID 52). The  
422 first part of the residential postcode of participants was computed based on the participant's home location  
423 (UKBID 22702 and 22704) and mapped to a deprivation score decile as previously described for GenOMICC  
424 participants. Ancestry was inferred as previously described for GenOMICC participants.



425 After excluding participants who had received PCR tests for Covid-19, based on information downloaded  
426 from the UK Biobank in August 2020, five individuals with matching inferred ancestry were sampled for each  
427 GenOMICC participant as controls. After sampling each control, individuals related up to 3rd degree were  
428 removed from the pool of potential further controls.

## 429 **Generation Scotland**

430 Generation Scotland: Scottish Family Health Study (hereafter referred to as Generation Scotland)  
431 is a population-based cohort of 24 084 participants sampled from five regional centers across Scot-  
432 land([www.generationscotland.org](http://www.generationscotland.org)).<sup>64</sup> A large subset of participants were genotyped using either Illumina  
433 HumanOmniExpressExome-8v1\_A or v1-2, and 20 032 passed QC criteria previously described.<sup>65,66</sup>  
434 Genotype imputation using the TOPMed reference panel was recently performed (freeze 5b) using Minimac4  
435 v1.0 on the University of Michigan server<https://imputationserver.sph.umich.edu>.<sup>67</sup> Imputation data from  
436 unrelated (genomic sharing identical by descent estimated using PLINK1.9 < 5%) participants were used as  
437 control genotypes in a GWAS using GenOMICC cases of European ancestry, for quality check purpose of  
438 associated variants.

## 439 **Replication**

440 GenOMICC EUR loci were defined by clumping function of PLINK 1.9 and clumping parameters  $r^2$  0.1  
441  $p_{val}=5e-8$  and  $p_{val2}$  0.01, and distance to the nearest gene was calculated using ENSEMBL grch37 gene  
442 annotation.

443 No GWAS has been reported of critical illness or mortality in Covid-19. As a surrogate, to provide some  
444 replication for our findings, replication analyses were performed using Host Genetics Initiative build 37,  
445 version 2 (July 2020) B2 (hospitalised Covid-19 vs population) v2 GWAS. Summary statistics were used from  
446 the full analysis, including all cohorts and GWAS without UK Biobank, to avoid sample overlap. Replication  
447 p-value was set to  $0.05/n$ , where  $n$  is the number of loci significant in the discovery.

## 448 **Post-GWAS analyses**

### 449 **TWAS**

450 We performed transcriptome-wide association using the MetaXcan framework<sup>25</sup> and the GTExv8 eQTL  
451 MASHR-M models available for download (<http://predictdb.org/>). First GWAS results were harmonised,  
452 lifted over to hg38 and linked to 1000 Genomes reference panel using GWAS tools <https://github.com/hakyimlab/summary-gwas-imputation/wiki/GWAS-Harmonization-And-Imputation>. TWAS for whole blood and  
453 lung were calculated using GWAS summary statistics for the European population GWAS and S-PrediXcan.  
454 Resulting p-values were corrected using the Bonferroni correction to find significant gene associations.  
455

### 456 **Mendelian randomisation**

457 Two-sample Summary data based Mendelian randomisation [PMID 27019110] was performed using the re-  
458 sults of GenOMICC and the Genotype-Tissue expression project, GTEx v7 (chosen in preference to v8  
459 because of the availability of pre-computed data for SMR/HEIDI), [PMID 29022597] with Generation Scot-  
460 land [PMID 22786799; PMID 17014726] forming a linkage disequilibrium reference. GenOMICC results  
461 from those of European ancestry were used as the outcome; and GTEx (v7) whole blood expression re-  
462 sults as the exposure. Data pertaining to GTEx v7 chosen were downloaded from the GTEx portal -  
463 <https://gtexportal.org/> (accessed 20 Feb 2020, 05 Apr 2020, and 04 Jul 2020), and SMR/HEIDI from  
464 <https://cnsgenomics.com/software/smr/> (accessed 03 Jul 2020). Analyses were conducted using Python  
465 3.7.3 and SMR/HEIDI v1.03. An LD reference was created using data from the population-based Genera-  
466 tion Scotland cohort (used with permission; described previously [PMID 28270201]): from a random set of  
467 5,000 individuals, using Plink v1.9 ([www.cog-genomics.org/plink/1.9/](http://www.cog-genomics.org/plink/1.9/)), a set of individuals with a genomic  
468 relatedness cutoff < 0.01 was extracted; 2,778 individuals remained in the final set. All data used for the  
469 SMR/HEIDI analyses were limited to autosomal biallelic SNPs: 4,264,462 variants remained in the final  
470 merged dataset.



471 Significant (as per GTEx v7; nominal p-value below nominal p-value threshold) local (distance to transcrip-  
472 tional start site < 1Mb) eQTL from GTEx v7 whole blood for protein coding genes (as per GENCODE v19)  
473 with a MAF > 0.01 (GTEx v7 and GenOMICC) were considered as potential instrumental variables. Per  
474 variant, we first selected the Ensembl gene ID to which it was most strongly associated (so as to ensure that  
475 each variant can only be considered as an instrument for the gene to which it is most strongly associated)  
476 followed by selecting the variant to which each Ensembl gene ID was most strongly associated. Instruments  
477 were available for 4,614 unique Ensembl gene IDs.

478 Results were assessed based upon a list of genes selected *a priori* as of interest (Supplementary Table 1),  
479 and together as a whole. Partial replication of Bonferroni-corrected significant results was attempted in  
480 the results of COVID19-Host Genetics Initiative - <https://www.covid19hg.org/> - with UK Biobank excluded  
481 (accessed 21 Sep 2020). Hospitalized covid vs. population (ANA\_B2\_V2) was selected as the phenotype  
482 most similar to our own, and therefore the most appropriate for use as a replication cohort. This is not  
483 a complete replication - due to the repeated use of GTEx v7 Whole Blood results in both analyses - yet  
484 remains informative as to the strength of association between the genetic variant and COVID19, with a  
485 consistent Mendelian Randomisation effect-size estimate.

#### 486 Gene-level

487 Gene-level burden of significance in the EUR ancestry group result was calculated using MAGMA v1.08.<sup>68</sup>  
488 SNPs were annotated to genes by mapping based on genomic location. SNPs were assigned to a gene if the  
489 SNPs location is within 5 kb up- or down-stream of the gene region (defined as the transcription start site  
490 to transcription stop site). The MAGMA SNP-wise mean method was applied which utilises the sum of  
491 squared SNP Z-statistics as the test statistic. The 1000 Genomes Project European reference panel was used  
492 to estimate LD between SNPs.

493 Auxiliary files were downloaded from <https://ctg.cncr.nl/software/magma> on 1st September 2020. Gene  
494 location files for protein-coding genes were obtained from NCBI (<ftp.ncbi.nlm.nih.gov>):

495 `gene/DATA/GENE_INFO/Mammalia/Homo_sapiens.gene_info.gz`

496 on 29/04/2015, and from:

497 `genomes/Homo_sapiens/ARCHIVE/ANNOTATION_RELEASE.105/mapview/seq_gene.md.gz`

498 on 25/05/2016.

499 The reference data files used to estimate LD are derived from Phase 3 of the 1000 Genomes Project.

500 Competitive gene set enrichment analysis was conducted in MAGMA using a regression model that ac-  
501 counts for gene-gene correlations, to reduce bias resulting from clustering of functionally similar genes on the  
502 genome.<sup>68</sup> Gene sets were queried from the databases KEGG 2019, Reactome 2016, GO Biological Process  
503 2018, Biocarta 2016 and WikiPathways 2019. The Benjamini-Hochberg procedure was used to control false  
504 discovery rate (<0.05).

#### 505 Meta-analysis by information content (MAIC)

506 Multiple *in vitro* and *in vivo* studies have identified key host genes that either directly interact with SARS-  
507 CoV-2, or define the host response to SARS-CoV-2. We have previously reported a systematic review of  
508 these studies.<sup>45</sup> In order to put the new associations from this GWAS into context, we performed a data-  
509 driven meta-analysis of gene-level results combined with pre-existing biological data using meta-analysis by  
510 information content (MAIC).<sup>69</sup> Briefly, MAIC combines experimental results from diverse sources in the form  
511 of ranked or unranked gene lists. The algorithm assigns a weighting to each input gene list, derived from the  
512 degree of overlap with other input lists. Each gene is then assigned a score calculated from the weightings for  
513 each gene list on which it appears. This process is repeated iteratively until all scores converge on a stable  
514 value. In order to prevent a single type of experiment from unduly biasing the results, input gene lists are  
515 assigned to categories, and a rule applied that only one weighting from each category can contribute to the  
516 score for any given gene.

## 517 Tissue and functional genomic enrichment

518 We downloaded the mean gene expression data summarised from RNA sequencing by the GTEx project  
519 (<https://gtexportal.org/>). The GTEx v7 data contain gene expressions of 19,791 genes in 48 human tissues.  
520 Gene expression values were normalized to numbers of transcripts per million reads (TPM). To measure the  
521 expression specificity of each gene in each tissue, each gene expression specificity was defined as the propor-  
522 tion of its expression in each tissue among all the tissues, i.e., a value ranging between 0 and 1. SNPs within  
523 the 10% most specifically expressed genes in each tissue were annotated for subsequent testing of heritability  
524 enrichment. For functional genomic enrichment analysis, we considered the inbuilt primary functional anno-  
525 tations v2.2 provided in the ldsc software (<https://alkesgroup.broadinstitute.org/LDSCORE/>) to annotated  
526 the SNPs.

527 With the annotated SNPs, we used stratified LD score regression (S-LDSC)<sup>70</sup> to test whether any human  
528 tissue or specific functional genomic feature is associated with severe Covid-19. Our GWAS summary statistics  
529 were harmonized by the munge\_sumstats.py procedure in ldsc. LD scores of HapMap3 SNPs (MHC region  
530 excluded) for gene annotations in each tissue were computed using a 1-cM window. The enrichment score  
531 was defined as the proportion of heritability captured by the annotated SNPs divided by the proportion of  
532 SNPs annotated.

## 533 Testing genetic correlations with other phenotypes

534 We applied both the LD score regression (LDSC)<sup>71</sup> and high-definition likelihood (HDL)<sup>26</sup> methods to eval-  
535 uate the genetic correlations between Severe Covid-19 and 818 GWASed phenotypes stored on LD-Hub.<sup>72</sup>  
536 GWAS summary statistics were harmonized by the munge\_sumstats.py procedure in the ldsc software. In  
537 the HDL analysis, we estimated the SNP-based narrow-sense heritability for each phenotype, and for the 818  
538 complex traits GWASs, those with SNPs less than 90% overlap with the HDL reference panel were removed.

## 539 Genome build

540 Results are presented using Genome Reference Consortium Human Build 37. Imputed genotypes and whole-  
541 genome sequence data were lifted over from Genome Reference Consortium Human Build 38 using Picard  
542 liftOverVCF mode from GATK 4.0 which is based on the UCSC liftOver tool(chain file obtained from [ftp:](ftp://ftp.ensembl.org/pub/assembly_mapping/homo_sapiens/GRCh38_to_GRCh37.chain.gz)  
543 [//ftp.ensembl.org/pub/assembly\\_mapping/homo\\_sapiens/GRCh38\\_to\\_GRCh37.chain.gz](ftp://ftp.ensembl.org/pub/assembly_mapping/homo_sapiens/GRCh38_to_GRCh37.chain.gz)).<sup>73</sup>

## 544 Acknowledgements

545 We thank the patients and their loved ones who volunteered to contribute to this study at one of the most  
546 difficult times in their lives, and the research staff in every intensive care unit who recruited patients at  
547 personal risk during the most extreme conditions we have ever witnessed in UK hospitals.

548 GenOMICC was funded by Sepsis Research (the Fiona Elizabeth Agnew Trust), the Intensive Care Society,  
549 a Wellcome-Beit Prize award to J. K. Baillie (Wellcome Trust 103258/Z/13/A) and a BBSRC Institute  
550 Program Support Grant to the Roslin Institute (BBS/E/D/20002172). Whole-genome sequencing was done  
551 in partnership with Genomics England and was funded by UK Department of Health and Social Care, UKRI  
552 and LifeArc. ISARIC 4C is supported by grants from: the Medical Research Council [grant MC\_PC\_19059],  
553 the National Institute for Health Research (NIHR) [award CO-CIN-01] and by the NIHR Health Protection  
554 Research Unit (HPRU) in Emerging and Zoonotic Infections at University of Liverpool in partnership with  
555 Public Health England (PHE), in collaboration with Liverpool School of Tropical Medicine and the University  
556 of Oxford [award 200907], NIHR HPRU in Respiratory Infections at Imperial College London with PHE  
557 [award 200927], Wellcome Trust and Department for International Development [215091/Z/18/Z], and the  
558 Bill and Melinda Gates Foundation [OPP1209135], and Liverpool Experimental Cancer Medicine Centre  
559 (Grant Reference: C18616/A25153), NIHR Biomedical Research Centre at Imperial College London [IS-BRC-  
560 1215-20013], EU Platform for European Preparedness Against (Re-) emerging Epidemics (PREPARE) [FP7  
561 project 602525] and NIHR Clinical Research Network for providing infrastructure support for this research.  
562 PJMO is supported by a NIHR Senior Investigator Award [award 201385]. The views expressed are those of  
563 the authors and not necessarily those of the DHSC, DID, NIHR, MRC, Wellcome Trust or PHE. HM was

564 supported by the NIHR BRC at University College London Hospitals. The Health Research Board of Ireland  
565 (Clinical Trial Network Award 2014-12) funds collection of samples in Ireland.

566 This research has been conducted using the UK Biobank Resource under project 788. Generation Scot-  
567 land received core support from the Chief Scientist Office of the Scottish Government Health Directorates  
568 [CZD/16/6] and the Scottish Funding Council [HR03006] and is currently supported by the Wellcome Trust  
569 [216767/Z/19/Z]. Genotyping of the GS:SFHS samples was carried out by the Genetics Core Laboratory at  
570 the Edinburgh Clinical Research Facility, University of Edinburgh, Scotland and was funded by the Medi-  
571 cal Research Council UK and the Wellcome Trust (Wellcome Trust Strategic Award STratifying Resilience  
572 and Depression Longitudinally (STRADL) Reference 104036/Z/14/Z). Genomics England and the 100,000  
573 Genomes Project was funded by the National Institute for Health Research, the Wellcome Trust, the Medical  
574 Research Council, Cancer Research UK, the Department of Health and Social Care and NHS England. Mark  
575 Caulfield is an NIHR Senior Investigator. This work is part of the portfolio of translational research at the  
576 NIHR Biomedical Research Centre at Barts and Cambridge. Research performed at the Human Genetics  
577 Unit was funded by the MRC (MC\_UU\_00007/10, MC\_UU\_00007/15). LK was supported by an RCUK In-  
578 novation Fellowship from the National Productivity Investment Fund (MR/R026408/1). ADB acknowledges  
579 funding from the Wellcome Trust PhD training fellowship for clinicians (204979/Z/16/Z), the Edinburgh Clin-  
580 ical Academic Track (ECAT) programme. We acknowledge support from the MRC Human Genetics Unit  
581 programme grant, “Quantitative traits in health and disease” (U. MC\_UU\_00007/10). A. Tenesa acknowl-  
582 edges funding from the BBSRC through programme grants BBS/E/D/10002070 and BBS/E/D/30002275,  
583 MRC research grant MR/P015514/1, and HDR-UK award HDR-9004 and HDR-9003.

584 This study owes a great deal to the National Institute of Healthcare Research Clinical Research Network  
585 (NIHR CRN) and the Chief Scientist Office (Scotland), who facilitate recruitment into research studies in  
586 NHS hospitals, and to the global ISARIC and InFACT consortia. We thank Dr. Jie Zheng (University of  
587 Bristol) for sharing the harmonized GWAS summary statistics used in LD-Hub.

## 588 References

- 589 1. Carsana, L., Sonzogni, A., Nasr, A., Rossi, R.S., Pellegrinelli, A., Zerbi, P., Rech, R., Colombo, R., Antinori,  
590 S., Corbellino, M., Galli, M., Catena, E., Tosoni, A., Gianatti, A. & Nebuloni, M. Pulmonary post-mortem  
591 findings in a series of covid-19 cases from northern italy: A two-centre descriptive study. *The Lancet.*  
592 *Infectious diseases* (2020).doi:[10.1016/S1473-3099\(20\)30434-5](https://doi.org/10.1016/S1473-3099(20)30434-5)
- 593 2. Horby, P., Lim, W.S., Emberson, J.R., Mafham, M., Bell, J.L., Linsell, L., Staplin, N., Brightling, C.,  
594 Ustianowski, A., Elmahi, E., Prudon, B., Green, C., Felton, T., Chadwick, D., Rege, K., Fegan, C., Chappell,  
595 L.C., Faust, S.N., Jaki, T., Jeffery, K., Montgomery, A., Rowan, K., Juszczak, E., Baillie, J.K., Haynes, R. &  
596 Landray, M.J. Dexamethasone in hospitalized patients with covid-19 - preliminary report. *The New England*  
597 *journal of medicine* (2020).doi:[10.1056/NEJMoa2021436](https://doi.org/10.1056/NEJMoa2021436)
- 598 3. Baillie, J.K. Translational genomics. Targeting the host immune response to fight infection. *Science (New*  
599 *York, N. Y.)* **344**, 807–8(2014).
- 600 4. Carvelli, J., Demaria, O., Vély, F., Batista, L., Benmansour, N.C., Fares, J., Carpentier, S., Thibult, M.-  
601 L., Morel, A., Remark, R., André, P., Represa, A., Piperoglou, C., Cordier, P.Y., Le Dault, E., Guervilly,  
602 C., Simeone, P., Gannier, M., Morel, Y., Ebbo, M., Schleinitz, N. & Vivier, E. Association of covid-19  
603 inflammation with activation of the c5a-c5ar1 axis. *Nature* (2020).doi:[10.1038/s41586-020-2600-6](https://doi.org/10.1038/s41586-020-2600-6)
- 604 5. Dorward, D.A., Russell, C.D., Um, I.H., Elshani, M., Armstrong, S.D., Penrice-Randal, R., Millar, T.,  
605 Lerpiniere, C.E., Tagliavini, G., Hartley, C.S., Randall, N.P., Gachanja, N.N., Potey, P.M., Anderson, A.M.,  
606 Campbell, V.L., Duguid, A.J., Qsous, W.A., BouHaidar, R., Baillie, J.K., Dhaliwal, K., Wallace, W.A.,  
607 Bellamy, C.O., Prost, S., Smith, C., Hiscox, J.A., Harrison, D.J., Lucas, C.D. & ICECAP Tissue-specific  
608 tolerance in fatal Covid-19. *medRxiv* 2020.07.02.20145003(2020).doi:[10.1101/2020.07.02.20145003](https://doi.org/10.1101/2020.07.02.20145003)
- 609 6. Sørensen, T.I., Nielsen, G.G., Andersen, P.K. & Teasdale, T.W. Genetic and environmental influences on  
610 premature death in adult adoptees. *The New England journal of medicine* **318**, 727–32(1988).

- 611 7.Patarčić, I., Gelemanović, A., Kirin, M., Kolčić, I., Theodoratou, E., Baillie, K.J., Jong, M.D. de, Rudan, I.,  
612 Campbell, H. & Polašek, O. The role of host genetic factors in respiratory tract infectious diseases: Systematic  
613 review, meta-analyses and field synopsis. *Scientific reports* **5**, 16119(2015).
- 614 8.Horby, P., Nguyen, N.Y., Dunstan, S.J. & Baillie, J.K. An updated systematic review of the role of host  
615 genetics in susceptibility to influenza. *Influenza and other respiratory viruses* **7 Suppl 2**, 37–41(2013).
- 616 9.Clohisey, S. & Baillie, J.K. Host susceptibility to severe influenza A virus infection. *Critical Care* **23**,  
617 303(2019).
- 618 10.Shelton, J.F., Shastri, A.J., Ye, C., Weldon, C.H., Filshtein-Somnez, T., Coker, D., Symons,  
619 A., Esparza-Gordillo, J., Team, T.2.C-1., Aslibekyan, S. & Auton, A. Trans-ethnic analysis  
620 reveals genetic and non-genetic associations with COVID-19 susceptibility and severity. *medRxiv*  
621 2020.09.04.20188318(2020).doi:[10.1101/2020.09.04.20188318](https://doi.org/10.1101/2020.09.04.20188318)
- 622 11.Ellinghaus, D., Degenhardt, F., Bujanda, L., Buti, M., Albillos, A., Invernizzi, P., Fernández, J., Prati,  
623 D., Baselli, G., Asselta, R., Grimsrud, M.M., Milani, C., Aziz, F., Kässens, J., May, S., Wendorff, M.,  
624 Wienbrandt, L., Uellendahl-Werth, F., Zheng, T., Yi, X., Pablo, R. de, Chercoles, A.G., Palom, A., Garcia-  
625 Fernandez, A.-E., Rodriguez-Frias, F., Zanella, A., Bandera, A., Protti, A., Aghemo, A., Lleo, A., Biondi,  
626 A., Caballero-Garralda, A., Gori, A., Tanck, A., Carreras Nolla, A., Latiano, A., Fracanzani, A.L., Peschuck,  
627 A., Julià, A., Pesenti, A., Voza, A., Jiménez, D., Mateos, B., Nafria Jimenez, B., Quereda, C., Paccapelo,  
628 C., Gassner, C., Angelini, C., Cea, C., Solier, A., Pestaña, D., Muñoz-Diaz, E., Sandoval, E., Paraboschi,  
629 E.M., Navas, E., García Sánchez, F., Ceriotti, F., Martinelli-Boneschi, F., Peyvandi, F., Blasi, F., Téllez,  
630 L., Blanco-Grau, A., Hemmrich-Stanisak, G., Grasselli, G., Costantino, G., Cardamone, G., Foti, G., Aneli,  
631 S., Kurihara, H., ElAbd, H., My, I., Galván-Femenia, I., Martín, J., Erdmann, J., Ferrusquía-Acosta, J.,  
632 Garcia-Etxebarria, K., Izquierdo-Sanchez, L., Bettini, L.R., Sumoy, L., Terranova, L., Moreira, L., Santoro,  
633 L., Scudeller, L., Mesonero, F., Roade, L., Rühlemann, M.C., Schaefer, M., Carrabba, M., Riveiro-Barciela,  
634 M., Figuera Basso, M.E., Valsecchi, M.G., Hernandez-Tejero, M., Acosta-Herrera, M., D'Angiò, M., Baldini,  
635 M., Cazzaniga, M., Schulzky, M., Cecconi, M., Wittig, M., Ciccarelli, M., Rodríguez-Gandía, M., Bocciolone,  
636 M., Miozzo, M., Montano, N., Braun, N., Sacchi, N., Martínez, N., Özer, O., Palmieri, O., Faverio, P.,  
637 Preatoni, P., Bonfanti, P., Omodei, P., Tentorio, P., Castro, P., Rodrigues, P.M., Blandino Ortiz, A., Cid,  
638 R. de, Ferrer, R., Gualtierotti, R., Nieto, R., Goerg, S., Badalamenti, S., Marsal, S., Matullo, G., Pelusi,  
639 S., Juzenas, S., Aliberti, S., Monzani, V., Moreno, V., Wesse, T., Lenz, T.L., Pumarola, T., Rimoldi, V.,  
640 Bosari, S., Albrecht, W., Peter, W., Romero-Gómez, M., D'Amato, M., Duga, S., Banales, J.M., Hov, J.R.,  
641 Folseraas, T., Valenti, L., Franke, A. & Karlsen, T.H. Genomewide association study of severe covid-19 with  
642 respiratory failure. *The New England journal of medicine* (2020).doi:[10.1056/NEJMoa2020283](https://doi.org/10.1056/NEJMoa2020283)
- 643 12.Casanova, J.-L. Severe infectious diseases of childhood as monogenic inborn errors of immunity. *Proceed-*  
644 *ings of the National Academy of Sciences of the United States of America* **112**, E7128–37(2015).
- 645 13.Plenge, R.M. Molecular underpinnings of severe coronavirus disease 2019. *JAMA* (2020).doi:[10.1001/jama.2020.14015](https://doi.org/10.1001/jama.2020.14015)
- 646 14.Millar, J.E., Neyton, L., Seth, S., Dunning, J., Merson, L., Murthy, S., Russell, C.D., Keating, S., Swets,  
647 M., Sudre, C.H., Spector, T.D., Ourselin, S., Steves, C.J., Wolf, J., Investigators, I., Docherty, A.B., Harrison,  
648 E.M., Openshaw, P.J., Semple, M.G. & Baillie, J.K. Robust, reproducible clinical patterns in hospitalised  
649 patients with COVID-19. *medRxiv* 2020.08.14.20168088(2020).doi:[10.1101/2020.08.14.20168088](https://doi.org/10.1101/2020.08.14.20168088)
- 650 15.Docherty, A.B., Harrison, E.M., Green, C.A., Hardwick, H.E., Pius, R., Norman, L., Holden, K.A., Read,  
651 J.M., Dondelinger, F., Carson, G., Merson, L., Lee, J., Plotkin, D., Sigfrid, L., Halpin, S., Jackson, C.,  
652 Gamble, C., Horby, P.W., Nguyen-Van-Tam, J.S., Ho, A., Russell, C.D., Dunning, J., Openshaw, P.J.,  
653 Baillie, J.K. & Semple, M.G. Features of 200.167em133 uk patients in hospital with covid-19 using the isaric  
654 who clinical characterisation protocol: Prospective observational cohort study. *BMJ (Clinical research ed.)*  
655 **369**, m1985(2020).
- 656 16.Angus, D.C., Derde, L., Al-Beidh, F., Annane, D., Arabi, Y., Beane, A., Bentum-Puijk, W. van, Berry,  
657 L., Bhimani, Z., Bonten, M., Bradbury, C., Brunkhorst, F., Buxton, M., Buzgau, A., Cheng, A.C., Jong, M.  
658 de, Detry, M., Estcourt, L., Fitzgerald, M., Goossens, H., Green, C., Haniffa, R., Higgins, A.M., Horvat, C.,  
659 Hulleger, S.J., Kruger, P., Lamontagne, F., Lawler, P.R., Linstrum, K., Litton, E., Lorenzi, E., Marshall, J.,  
660 McAuley, D., McGlothlin, A., McGuinness, S., McVerry, B., Montgomery, S., Mouncey, P., Murthy, S., Nichol,



- 661 A., Parke, R., Parker, J., Rowan, K., Sanil, A., Santos, M., Saunders, C., Seymour, C., Turner, A., Veerdonk,  
662 F. van de, Venkatesh, B., Zarychanski, R., Berry, S., Lewis, R.J., McArthur, C., Webb, S.A. & Gordon, A.C.  
663 Effect of hydrocortisone on mortality and organ support in patients with severe covid-19: The remap-cap  
664 covid-19 corticosteroid domain randomized clinical trial. *JAMA* (2020).doi:[10.1001/jama.2020.17022](https://doi.org/10.1001/jama.2020.17022)
- 665 17.Baillie, J.K. & Digard, P. Influenza Time to Target the Host? *New England Journal of Medicine* **369**,  
666 191–193(2013).
- 667 18.D, T., Dn, H., Md, K., J, C., Za, S., R, T., Sag, T., A, C., Sm, G., Hm, K., An, P., J, L., S, L., X, T.,  
668 Bl, B., S, D., A, E., We, C., Dp, L., Ac, S., Tw, B., Q, W., Dk, A., Ae, A.-K., Kc, B., E, B., S, G., R, G.,  
669 Km, R., Ss, R., E, S., P, Q., W, G., Gj, P., Da, N., Sr, B., Mc, Z., S, Z., Jg, W., La, C., Cc, L., Ce, J., Rd,  
670 H., Td, O., Gr, A. & undefined Sequencing of 53,831 diverse genomes from the NHLBI TOPMed Program.  
671 (2019).doi:[10.1101/563866](https://doi.org/10.1101/563866)
- 672 19.Pruim, R.J., Welch, R.P., Sanna, S., Teslovich, T.M., Chines, P.S., Gliedt, T.P., Boehnke, M., Abecasis,  
673 G.R. & Willer, C.J. LocusZoom: Regional visualization of genome-wide association scan results. *Bioinfor-*  
674 *matics (Oxford, England)* **26**, 2336–7(2010).
- 675 20.Willer, C.J., Li, Y. & Abecasis, G.R. METAL: Fast and efficient meta-analysis of genomewide association  
676 scans. *Bioinformatics (Oxford, England)* **26**, 2190–1(2010).
- 677 21.Bretherick, A.D., Canela-Xandri, O., Joshi, P.K., Clark, D.W., Rawlik, K., Boutin, T.S., Zeng, Y.,  
678 Amador, C., Navarro, P., Rudan, I., Wright, A.F., Campbell, H., Vitart, V., Hayward, C., Wilson, J.F.,  
679 Tenesa, A., Ponting, C.P., Baillie, J.K. & Haley, C. Linking protein to phenotype with mendelian randomiza-  
680 tion detects 38 proteins with causal roles in human diseases and traits. *PLoS genetics* **16**, e1008785(2020).
- 681 22.Zhu, Z., Zhang, F., Hu, H., Bakshi, A., Robinson, M.R., Powell, J.E., Montgomery, G.W., Goddard, M.E.,  
682 Wray, N.R., Visscher, P.M. & Yang, J. Integration of summary data from gwas and eQTL studies predicts  
683 complex trait gene targets. *Nature genetics* **48**, 481–7(2016).
- 684 23.Gamazon, E.R., Wheeler, H.E., Shah, K.P., Mozaffari, S.V., Aquino-Michaels, K., Carroll, R.J., Eyler,  
685 A.E., Denny, J.C., Nicolae, D.L., Cox, N.J. & Im, H.K. A gene-based association method for mapping traits  
686 using reference transcriptome data. *Nature genetics* **47**, 1091–8(2015).
- 687 24.Gusev, A., Ko, A., Shi, H., Bhatia, G., Chung, W., Penninx, B.W.J.H., Jansen, R., Geus, E.J.C. de,  
688 Boomsma, D.I., Wright, F.A., Sullivan, P.F., Nikkola, E., Alvarez, M., Civelek, M., Lusic, A.J., Lehtimäki, T.,  
689 Raitoharju, E., Kähönen, M., Seppälä, I., Raitakari, O.T., Kuusisto, J., Laakso, M., Price, A.L., Pajukanta, P.  
690 & Pasaniuc, B. Integrative approaches for large-scale transcriptome-wide association studies. *Nature genetics*  
691 **48**, 245–52(2016).
- 692 25.Barbeira, A.N., Dickinson, S.P., Bonazzola, R., Zheng, J., Wheeler, H.E., Torres, J.M., Torstenson, E.S.,  
693 Shah, K.P., Garcia, T., Edwards, T.L., Stahl, E.A., Huckins, L.M., Nicolae, D.L., Cox, N.J. & Im, H.K. Ex-  
694 ploring the phenotypic consequences of tissue specific gene expression variation inferred from gwas summary  
695 statistics. *Nature communications* **9**, 1825(2018).
- 696 26.Ning, Z., Pawitan, Y. & Shen, X. High-definition likelihood inference of genetic correlations across human  
697 complex traits. *Nature genetics* **52**, 859–864(2020).
- 698 27.Andersson, R., Gebhard, C., Miguel-Escalada, I., Hoof, I., Bornholdt, J., Boyd, M., Chen, Y., Zhao, X.,  
699 Schmidl, C., Suzuki, T., Ntini, E., Arner, E., Valen, E., Li, K., Schwarzfischer, L., Glatz, D., Raithel, J.,  
700 Lilje, B., Rapin, N., Bagger, F.O., Jørgensen, M., Andersen, P.R., Bertin, N., Rackham, O., Burroughs, A.M.,  
701 Baillie, J.K., Ishizu, Y., Shimizu, Y., Furuhashi, E., Maeda, S., Negishi, Y., Mungall, C.J., Meehan, T.F.,  
702 Lassmann, T., Itoh, M., Kawaji, H., Kondo, N., Kawai, J., Lennartsson, A., Daub, C.O., Heutink, P., Hume,  
703 D.A., Jensen, T.H., Suzuki, H., Hayashizaki, Y., Müller, F., Consortium, T.F., Forrest, A.R.R., Carninci,  
704 P., Rehli, M. & Sandelin, A. An atlas of active enhancers across human cell types and tissues. *Nature* **507**,  
705 455–461(2014).
- 706 28.Villar, D., Berthelot, C., Aldridge, S., Rayner, T.F., Lukk, M., Pignatelli, M., Park, T.J., Deaville, R.,  
707 Erichsen, J.T., Jasinska, A.J., Turner, J.M.A., Bertelsen, M.F., Murchison, E.P., Flicek, P. & Odom, D.T.  
708 Enhancer evolution across 20 mammalian species. *Cell* **160**, 554–66(2015).

- 709 29. Plenge, R.M., Scolnick, E.M. & Altshuler, D. Validating therapeutic targets through human genetics.  
710 *Nature Reviews Drug Discovery* **12**, 581–594(2013).
- 711 30. Davies, N.M., Holmes, M.V. & Smith, G.D. Reading Mendelian randomisation studies: A guide, glossary,  
712 and checklist for clinicians. *BMJ* **362**, k601(2018).
- 713 31. Wunsch, H., Linde-Zwirble, W.T., Angus, D.C., Hartman, M.E., Milbrandt, E.B. & Kahn, J.M. The  
714 epidemiology of mechanical ventilation use in the united states. *Critical care medicine* **38**, 1947–53(2010).
- 715 32. Sadler, A.J. & Williams, B.R.G. Interferon-inducible antiviral effectors. *Nature reviews. Immunology* **8**,  
716 559–68(2008).
- 717 33. Duncan, C.J.A., Mohamad, S.M.B., Young, D.F., Skelton, A.J., Leahy, T.R., Munday, D.C., Butler, K.M.,  
718 Morfopoulou, S., Brown, J.R., Hubank, M., Connell, J., Gavin, P.J., McMahon, C., Dempsey, E., Lynch, N.E.,  
719 Jacques, T.S., Valappil, M., Cant, A.J., Breuer, J., Engelhardt, K.R., Randall, R.E. & Hambleton, S. Human  
720 ifnar2 deficiency: Lessons for antiviral immunity. *Science translational medicine* **7**, 307ra154(2015).
- 721 34. Hambleton, S., Goodbourn, S., Young, D.F., Dickinson, P., Mohamad, S.M.B., Valappil, M., McGovern,  
722 N., Cant, A.J., Hackett, S.J., Ghazal, P., Morgan, N.V. & Randall, R.E. STAT2 deficiency and susceptibility  
723 to viral illness in humans. *Proceedings of the National Academy of Sciences of the United States of America*  
724 **110**, 3053–8(2013).
- 725 35. Shepardson, K.M., Larson, K., Johns, L.L., Stanek, K., Cho, H., Wellham, J., Henderson, H. & Rynda-  
726 Apple, A. IFNAR2 is required for anti-influenza immunity and alters susceptibility to post-influenza bacterial  
727 superinfections. *Frontiers in immunology* **9**, 2589(2018).
- 728 36. Choi, U.Y., Kang, J.-S., Hwang, Y.S. & Kim, Y.-J. Oligoadenylate synthase-like (oasl) proteins: Dual  
729 functions and associations with diseases. *Experimental & molecular medicine* **47**, e144(2015).
- 730 37. Hagemeyer, M.C., Vonk, A.M., Monastyrska, I., Rottier, P.J.M. & Haan, C.A.M. de Visualizing coron-  
731 avirus rna synthesis in time by using click chemistry. *Journal of virology* **86**, 5808–16(2012).
- 732 38. Hamano, E., Hijikata, M., Itoyama, S., Quy, T., Phi, N.C., Long, H.T., Ha, L.D., Ban, V.V., Matsushita,  
733 I., Yanai, H., Kirikae, F., Kirikae, T., Kuratsuji, T., Sasazuki, T. & Keicho, N. Polymorphisms of interferon-  
734 inducible genes *oas-1* and *mx2* associated with sars in the vietnamese population. *Biochemical and biophysical*  
735 *research communications* **329**, 1234–9(2005).
- 736 39. He, J., Feng, D., Vlas, S.J. de, Wang, H., Fontanet, A., Zhang, P., Plancoulaine, S., Tang, F., Zhan, L.,  
737 Yang, H., Wang, T., Richardus, J.H., Habbema, J.D.F. & Cao, W. Association of sars susceptibility with  
738 single nucleic acid polymorphisms of *oas1* and *mx2* genes: A case-control study. *BMC infectious diseases* **6**,  
739 106(2006).
- 740 40. Fingerlin, T.E., Murphy, E., Zhang, W., Peljto, A.L., Brown, K.K., Steele, M.P., Loyd, J.E., Cosgrove,  
741 G.P., Lynch, D., Groshong, S., Collard, H.R., Wolters, P.J., Bradford, W.Z., Kossen, K., Seiwert, S.D., Bois,  
742 R.M. du, Garcia, C.K., Devine, M.S., Gudmundsson, G., Isaksson, H.J., Kaminski, N., Zhang, Y., Gibson,  
743 K.F., Lancaster, L.H., Cogan, J.D., Mason, W.R., Maher, T.M., Molyneaux, P.L., Wells, A.U., Moffatt,  
744 M.F., Selman, M., Pardo, A., Kim, D.S., Crapo, J.D., Make, B.J., Regan, E.A., Walek, D.S., Daniel, J.J.,  
745 Kamatani, Y., Zelenika, D., Smith, K., McKean, D., Pedersen, B.S., Talbert, J., Kidd, R.N., Markin, C.R.,  
746 Beckman, K.B., Lathrop, M., Schwarz, M.I. & Schwartz, D.A. Genome-wide association study identifies  
747 multiple susceptibility loci for pulmonary fibrosis. *Nature genetics* **45**, 613–20(2013).
- 748 41. Allen, R.J., Guillen-Guio, B., Oldham, J.M., Ma, S.-F., Dressen, A., Paynton, M.L., Kraven, L.M., Obei-  
749 dat, M., Li, X., Ng, M., Braybrooke, R., Molina-Molina, M., Hobbs, B.D., Putman, R.K., Sakornsakolpat,  
750 P., Booth, H.L., Fahy, W.A., Hart, S.P., Hill, M.R., Hirani, N., Hubbard, R.B., McAnulty, R.J., Millar,  
751 A.B., Navaratnam, V., Oballa, E., Parfrey, H., Saini, G., Whyte, M.K.B., Zhang, Y., Kaminski, N., Adegun-  
752 soye, A., Streck, M.E., Neighbors, M., Sheng, X.R., Gudmundsson, G., Gudnason, V., Hatabu, H., Lederer,  
753 D.J., Manichaikul, A., Newell, J.D., O'Connor, G.T., Ortega, V.E., Xu, H., Fingerlin, T.E., Bossé, Y., Hao,  
754 K., Joubert, P., Nickle, D.C., Sin, D.D., Timens, W., Furniss, D., Morris, A.P., Zondervan, K.T., Hall,  
755 I.P., Sayers, I., Tobin, M.D., Maher, T.M., Cho, M.H., Hunninghake, G.M., Schwartz, D.A., Yaspan, B.L.,



- 756 Molyneaux, P.L., Flores, C., Noth, I., Jenkins, R.G. & Wain, L.V. Genome-wide association study of sus-  
757 ceptibility to idiopathic pulmonary fibrosis. *American journal of respiratory and critical care medicine* **201**,  
758 564–574(2020).
- 759 42.Zhang, H., Maqsudi, S., Rainczuk, A., Duffield, N., Lawrence, J., Keane, F.M., Justa-Schuch, D., Geiss-  
760 Friedlander, R., Gorrell, M.D. & Stephens, A.N. Identification of novel dipeptidyl peptidase 9 substrates by  
761 two-dimensional differential in-gel electrophoresis. *The FEBS journal* **282**, 3737–57(2015).
- 762 43.Geiss-Friedlander, R., Parmentier, N., Möller, U., Urlaub, H., Van den Eynde, B.J. & Melchior, F. The  
763 cytoplasmic peptidase dpp9 is rate-limiting for degradation of proline-containing peptides. *The Journal of*  
764 *biological chemistry* **284**, 27211–9(2009).
- 765 44.Nguyen, D.-T., Mathias, S., Bologa, C., Brunak, S., Fernandez, N., Gaulton, A., Hersey, A., Holmes, J.,  
766 Jensen, L.J., Karlsson, A., Liu, G., Ma'ayan, A., Mandava, G., Mani, S., Mehta, S., Overington, J., Patel,  
767 J., Rouillard, A.D., Schürer, S., Sheils, T., Simeonov, A., Sklar, L.A., Southall, N., Ursu, O., Vidovic, D.,  
768 Waller, A., Yang, J., Jadhav, A., Oprea, T.I. & Guha, R. Pharos: Collating protein information to shed light  
769 on the druggable genome. *Nucleic acids research* **45**, D995–D1002(2017).
- 770 45.Parkinson, N., Rodgers, N., Fourman, M.H., Wang, B., Zechner, M., Swets, M., Millar, J.E., Law, A., Rus-  
771 sell, C., Baillie, J.K. & Clohisey, S. Systematic review and meta-analysis identifies potential host therapeutic  
772 targets in COVID-19. *medRxiv* 2020.08.27.20182238(2020).doi:[10.1101/2020.08.27.20182238](https://doi.org/10.1101/2020.08.27.20182238)
- 773 46.Zhou, Z., Ren, L., Zhang, L., Zhong, J., Xiao, Y., Jia, Z., Guo, L., Yang, J., Wang, C., Jiang, S., Yang, D.,  
774 Zhang, G., Li, H., Chen, F., Xu, Y., Chen, M., Gao, Z., Yang, J., Dong, J., Liu, B., Zhang, X., Wang, W.,  
775 He, K., Jin, Q., Li, M. & Wang, J. Heightened innate immune responses in the respiratory tract of covid-19  
776 patients. *Cell host & microbe* **27**, 883–890.e2(2020).
- 777 47.Zhao, Y., Qin, L., Zhang, P., Li, K., Liang, L., Sun, J., Xu, B., Dai, Y., Li, X., Zhang, C., Peng, Y., Feng,  
778 Y., Li, A., Hu, Z., Xiang, H., Ogg, G., Ho, L.-P., McMichael, A., Jin, R., Knight, J.C., Dong, T. & Zhang, Y.  
779 Longitudinal covid-19 profiling associates il-1RA and il-10 with disease severity and rantes with mild disease.  
780 *JCI insight* **5**, (2020).
- 781 48.Vergunst, C.E., Gerlag, D.M., Lopatinskaya, L., Klareskog, L., Smith, M.D., Bosch, F. van den, Dinant,  
782 H.J., Lee, Y., Wyant, T., Jacobson, E.W., Baeten, D. & Tak, P.P. Modulation of ccr2 in rheumatoid arthritis:  
783 A double-blind, randomized, placebo-controlled clinical trial. *Arthritis and rheumatism* **58**, 1931–9(2008).
- 784 49.Docherty, A.B., Harrison, E.M., Green, C.A., Hardwick, H.E., Pius, R., Norman, L., Holden, K.A., Read,  
785 J.M., Dondelinger, F., Carson, G., Merson, L., Lee, J., Plotkin, D., Sigfrid, L., Halpin, S., Jackson, C.,  
786 Gamble, C., Horby, P.W., Nguyen-Van-Tam, J.S., Ho, A., Russell, C.D., Dunning, J., Openshaw, P.J.,  
787 Baillie, J.K. & Semple, M.G. Features of 20 133 UK patients in hospital with covid-19 using the ISARIC  
788 WHO Clinical Characterisation Protocol: Prospective observational cohort study. *BMJ* **369**, (2020).
- 789 50.Williamson, E.J., Walker, A.J., Bhaskaran, K., Bacon, S., Bates, C., Morton, C.E., Curtis, H.J., Mehrkar,  
790 A., Evans, D., Inglesby, P., Cockburn, J., McDonald, H.I., MacKenna, B., Tomlinson, L., Douglas, I.J.,  
791 Rentsch, C.T., Mathur, R., Wong, A.Y.S., Grieve, R., Harrison, D., Forbes, H., Schultze, A., Croker, R.,  
792 Parry, J., Hester, F., Harper, S., Perera, R., Evans, S.J.W., Smeeth, L. & Goldacre, B. Factors associated  
793 with covid-19-related death using opensafely. *Nature* **584**, 430–436(2020).
- 794 51.Sudlow, C., Gallacher, J., Allen, N., Beral, V., Burton, P., Danesh, J., Downey, P., Elliott, P., Green, J.,  
795 Landray, M., Liu, B., Matthews, P., Ong, G., Pell, J., Silman, A., Young, A., Sprosen, T., Peakman, T. &  
796 Collins, R. UK Biobank: An Open Access Resource for Identifying the Causes of a Wide Range of Complex  
797 Diseases of Middle and Old Age. *PLOS Medicine* **12**, e1001779(2015).
- 798 52.McKenna, A., Hanna, M., Banks, E., Sivachenko, A., Cibulskis, K., Kernytzky, A., Garimella, K., Alt-  
799 shuler, D., Gabriel, S., Daly, M. & DePristo, M.A. The genome analysis toolkit: A mapreduce framework for  
800 analyzing next-generation dna sequencing data. *Genome research* **20**, 1297–303(2010).
- 801 53.Meynert, A.M., Ansari, M., FitzPatrick, D.R. & Taylor, M.S. Variant detection sensitivity and biases in  
802 whole genome and exome sequencing. *BMC bioinformatics* **15**, 247(2014).

- 803 54.Guo, Y., He, J., Zhao, S., Wu, H., Zhong, X., Sheng, Q., Samuels, D.C., Shyr, Y. & Long, J. Illumina  
804 human exome genotyping array clustering and quality control. *Nature protocols* **9**, 2643–62(2014).
- 805 55.Gaziano, J.M., Concato, J., Brophy, M., Fiore, L., Pyarajan, S., Breeling, J., Whitbourne, S., Deen, J.,  
806 Shannon, C., Humphries, D., Guarino, P., Aslan, M., Anderson, D., LaFleur, R., Hammond, T., Schaa, K.,  
807 Moser, J., Huang, G., Muralidhar, S., Przygodzki, R. & O'Leary, T.J. Million veteran program: A mega-  
808 biobank to study genetic influences on health and disease. *Journal of clinical epidemiology* **70**, 214–23(2016).
- 809 56.Manichaikul, A., Mychaleckyj, J.C., Rich, S.S., Daly, K., Sale, M. & Chen, W.-M. Robust relationship  
810 inference in genome-wide association studies. *Bioinformatics (Oxford, England)* **26**, 2867–73(2010).
- 811 57.Yang, J., Lee, S.H., Goddard, M.E. & Visscher, P.M. GCTA: A tool for genome-wide complex trait analysis.  
812 *American journal of human genetics* **88**, 76–82(2011).
- 813 58.Alexander, D.H. & Lange, K. Enhancements to the admixture algorithm for individual ancestry estimation.  
814 *BMC bioinformatics* **12**, 246(2011).
- 815 59.Wigginton, J.E., Cutler, D.J. & Abecasis, G.R. A note on exact tests of hardy-weinberg equilibrium.  
816 *American journal of human genetics* **76**, 887–93(2005).
- 817 60.Chang, C.C., Chow, C.C., Tellier, L.C., Vattikuti, S., Purcell, S.M. & Lee, J.J. Second-generation plink:  
818 Rising to the challenge of larger and richer datasets. *GigaScience* **4**, 7(2015).
- 819 61.Abraham, G., Qiu, Y. & Inouye, M. FlashPCA2: Principal component analysis of biobank-scale genotype  
820 datasets. *Bioinformatics (Oxford, England)* **33**, 2776–2778(2017).
- 821 62.Karczewski, K.J., Francioli, L.C., Tiao, G., Cummings, B.B., Alföldi, J., Wang, Q., Collins, R.L., Laricchia,  
822 K.M., Ganna, A., Birnbaum, D.P., Gauthier, L.D., Brand, H., Solomonson, M., Watts, N.A., Rhodes, D.,  
823 Singer-Berk, M., England, E.M., Seaby, E.G., Kosmicki, J.A., Walters, R.K., Tashman, K., Farjoun, Y.,  
824 Banks, E., Poterba, T., Wang, A., Seed, C., Whiffin, N., Chong, J.X., Samocha, K.E., Pierce-Hoffman, E.,  
825 Zappala, Z., O'Donnell-Luria, A.H., Minikel, E.V., Weisburd, B., Lek, M., Ware, J.S., Vittal, C., Armean,  
826 I.M., Bergelson, L., Cibulskis, K., Connolly, K.M., Covarrubias, M., Donnelly, S., Ferriera, S., Gabriel, S.,  
827 Gentry, J., Gupta, N., Jeandet, T., Kaplan, D., Llanwarne, C., Munshi, R., Novod, S., Petrillo, N., Roazen,  
828 D., Ruano-Rubio, V., Saltzman, A., Schleicher, M., Soto, J., Tibbetts, K., Tolonen, C., Wade, G., Talkowski,  
829 M.E., Neale, B.M., Daly, M.J. & MacArthur, D.G. The mutational constraint spectrum quantified from  
830 variation in 141,456 humans. *Nature* **581**, 434–443(2020).
- 831 63.Purcell, S., Neale, B., Todd-Brown, K., Thomas, L., Ferreira, M.A.R., Bender, D., Maller, J., Sklar, P.,  
832 Bakker, P.I.W. de, Daly, M.J. & Sham, P.C. PLINK: A tool set for whole-genome association and population-  
833 based linkage analyses. *American journal of human genetics* **81**, 559–75(2007).
- 834 64.Smith, B.H., Campbell, A., Linksted, P., Fitzpatrick, B., Jackson, C., Kerr, S.M., Deary, I.J., Macintyre,  
835 D.J., Campbell, H., McGilchrist, M., Hocking, L.J., Wisely, L., Ford, I., Lindsay, R.S., Morton, R., Palmer,  
836 C.N.A., Dominiczak, A.F., Porteous, D.J. & Morris, A.D. Cohort profile: Generation scotland: Scottish  
837 family health study (gs:SFHS). The study, its participants and their potential for genetic research on health  
838 and illness. *International journal of epidemiology* **42**, 689–700(2013).
- 839 65.Amador, C., Huffman, J., Trochet, H., Campbell, A., Porteous, D., Wilson, J.F., Hastie, N., Vitart, V.,  
840 Hayward, C., Navarro, P. & Haley, C.S. Recent genomic heritage in scotland. *BMC genomics* **16**, 437(2015).
- 841 66.Nagy, R., Boutin, T.S., Marten, J., Huffman, J.E., Kerr, S.M., Campbell, A., Evenden, L., Gibson, J.,  
842 Amador, C., Howard, D.M., Navarro, P., Morris, A., Deary, I.J., Hocking, L.J., Padmanabhan, S., Smith,  
843 B.H., Joshi, P., Wilson, J.F., Hastie, N.D., Wright, A.F., McIntosh, A.M., Porteous, D.J., Haley, C.S., Vitart,  
844 V. & Hayward, C. Exploration of haplotype research consortium imputation for genome-wide association  
845 studies in 20,032 generation scotland participants. *Genome medicine* **9**, 23(2017).
- 846 67.Das, S., Forer, L., Schön herr, S., Sidore, C., Locke, A.E., Kwong, A., Vrieze, S.I., Chew, E.Y., Levy, S.,  
847 McGue, M., Schlessinger, D., Stambolian, D., Loh, P.-R., Iacono, W.G., Swaroop, A., Scott, L.J., Cucca,  
848 F., Kronenberg, F., Boehnke, M., Abecasis, G.R. & Fuchsberger, C. Next-generation genotype imputation  
849 service and methods. *Nature genetics* **48**, 1284–1287(2016).

- 850 68.Leeuw, C.A. de, Mooij, J.M., Heskes, T. & Posthuma, D. MAGMA: Generalized gene-set analysis of gwas  
851 data. *PLoS computational biology* **11**, e1004219(2015).
- 852 69.Li, B., Clohisey, S.M., Chia, B.S., Wang, B., Cui, A., Eisenhaure, T., Schweitzer, L.D., Hoover, P.,  
853 Parkinson, N.J., Nachshon, A., Smith, N., Regan, T., Farr, D., Gutmann, M.U., Bukhari, S.I., Law, A.,  
854 Sangesland, M., Gat-Viks, I., Digard, P., Vasudevan, S., Lingwood, D., Dockrell, D.H., Doench, J.G., Baillie,  
855 J.K. & Hacohen, N. Genome-wide CRISPR screen identifies host dependency factors for influenza A virus  
856 infection. *Nature Communications* **11**, 164(2020).
- 857 70.Finucane, H.K., Bulik-Sullivan, B., Gusev, A., Trynka, G., Reshef, Y., Loh, P.-R., Anttila, V., Xu,  
858 H., Zang, C., Farh, K., Ripke, S., Day, F.R., Purcell, S., Stahl, E., Lindstrom, S., Perry, J.R.B., Okada, Y.,  
859 Raychaudhuri, S., Daly, M.J., Patterson, N., Neale, B.M. & Price, A.L. Partitioning heritability by functional  
860 annotation using genome-wide association summary statistics. *Nature genetics* **47**, 1228–35(2015).
- 861 71.Bulik-Sullivan, B., Finucane, H.K., Anttila, V., Gusev, A., Day, F.R., Loh, P.-R., Duncan, L., Perry,  
862 J.R.B., Patterson, N., Robinson, E.B., Daly, M.J., Price, A.L. & Neale, B.M. An atlas of genetic correlations  
863 across human diseases and traits. *Nature genetics* **47**, 1236–41(2015).
- 864 72.Zheng, J., Erzurumluoglu, A.M., Elsworth, B.L., Kemp, J.P., Howe, L., Haycock, P.C., Hemani, G.,  
865 Tansey, K., Laurin, C., Pourcain, B.S., Warrington, N.M., Finucane, H.K., Price, A.L., Bulik-Sullivan, B.K.,  
866 Anttila, V., Paternoster, L., Gaunt, T.R., Evans, D.M. & Neale, B.M. LD hub: A centralized database and  
867 web interface to perform ld score regression that maximizes the potential of summary level gwas data for snp  
868 heritability and genetic correlation analysis. *Bioinformatics (Oxford, England)* **33**, 272–279(2017).
- 869 73.Hinrichs, A.S., Karolchik, D., Baertsch, R., Barber, G.P., Bejerano, G., Clawson, H., Diekhans, M.,  
870 Furey, T.S., Harte, R.A., Hsu, F., Hillman-Jackson, J., Kuhn, R.M., Pedersen, J.S., Pohl, A., Raney, B.J.,  
871 Rosenbloom, K.R., Siepel, A., Smith, K.E., Sugnet, C.W., Sultan-Qurraie, A., Thomas, D.J., Trumbower,  
872 H., Weber, R.J., Weirauch, M., Zweig, A.S., Haussler, D. & Kent, W.J. The ucsc genome browser database:  
873 Update 2006. *Nucleic acids research* **34**, D590–8(2006).
